## Cross-sectional evaluation of humoral responses against SARS-CoV-2 Spike

Jérémie Prévost<sup>1,2,\*</sup>, Romain Gasser<sup>1,2,\*</sup>, Guillaume Beaudoin-Bussièrès<sup>1,2,\*</sup>, Jonathan Richard<sup>1,2\*</sup>, Ralf Duerr<sup>3\*</sup>, Annemarie Laumaea<sup>1,2,\*</sup>, Sai Priya Anand<sup>1,4</sup>, Guillaume Goyette<sup>1</sup>, Mehdi Benlarbi<sup>1</sup>, Shilei Ding<sup>1,2</sup>, Halima Medjahed<sup>1</sup>, Antoine Lewin<sup>5</sup>, Josée Perreault<sup>5</sup>, Tony Tremblay<sup>5</sup>, Gabrielle Gendron-Lepage<sup>1</sup>, Nicolas Gauthier<sup>6</sup>, Marc Carrier<sup>7</sup>, Diane Marcoux<sup>8</sup>, Alain Piché<sup>9</sup>, Myriam Lavoie<sup>10</sup>, Alexandre Benoit<sup>11</sup>, Vilayvong Loungnarath<sup>12</sup>, Gino Brochu<sup>13</sup>, Elie Haddad<sup>2,15,18</sup>, Hannah D. Stacey<sup>19</sup>, Matthew S. Miller<sup>19</sup>, Marc Desforges<sup>14,15</sup>, Pierre J. Talbot<sup>14</sup>, Graham T. Gould Maule<sup>16</sup>, Marceline Côté<sup>16</sup>, Christian Therrien<sup>17</sup>, Bouchra Serhir<sup>17</sup>, Renée Bazin<sup>5</sup>, Michel Roger<sup>1,2,17</sup> and Andrés Finzi<sup>1,2,4,#</sup>

<sup>1</sup>Centre de Recherche du CHUM, QC H2X 0A9, Canada

<sup>2</sup>Département de Microbiologie, Infectiologie et Immunologie, Université de Montréal, Montreal, QC H2X 0A9, Canada

<sup>3</sup>Department of Pathology, New York University School of Medicine, New York, NY 10016, USA

<sup>4</sup>Department of Microbiology and Immunology, McGill University, Montreal, QC H3A 2B4, Canada

<sup>5</sup>Héma-Québec, Affaires Médicales et Innovation, Québec, QC G1V 5C3, Canada

<sup>6</sup>Hôpital Sacré-Cœur de Montréal, Montreal, QC H4J 1C5, Canada

<sup>7</sup>Hôpital Cité-de-la-Santé, Laval, QC H7M 3L9, Canada

<sup>8</sup>Hôtel-Dieu de Lévis, Lévis, QC G6V 3Z1, Canada

<sup>9</sup>Centre Hospitalier Universitaire de Sherbrooke, Sherbrooke, QC J1H 5H4, Canada

<sup>10</sup>CIUSSS du Saguenay-Lac-Saint-Jean, Hôpital de Chicoutimi, Chicoutimi, QC G7H 5H6, Canada

<sup>11</sup>Hôpital de Verdun, Montreal, QC H4G 2A3, Canada

<sup>12</sup>CHU de Québec, Hôpital Enfant-Jésus, Quebec, QC G1J 1Z4, Canada

<sup>13</sup>CIUSSS de la Mauricie-et-du-Centre-du-Québec, Trois-Rivières, QC G9A 5C5, Canada

<sup>14</sup>INRS-Institut Armand Frappier, Laval, QC H7V 1B7, Canada

<sup>15</sup>CHU Ste-Justine, Montreal, QC H3T 1C5, Canada

<sup>16</sup>Department of Biochemistry, Microbiology and Immunology, and Center for Infection, Immunity, and Inflammation, University of Ottawa, Ottawa, ON K1H 8M5, Canada

<sup>17</sup>Laboratoire de Santé Publique du Québec, Institut national de santé publique du Québec, Sainte-Anne-de-Bellevue, QC H9X 3R5, Canada

<sup>18</sup>Département de Pédiatrie, Université de Montréal, Montreal, QC H3T 1C5, Canada

<sup>19</sup>Micheal G. DeGroot Institute for Infectious Disease Research, Master Immunology Research Centre, Department of Biochemistry and Biomedical Sciences, McMaster University, Hamilton, ON L8N 3Z5, Canada

\*Contributed equally

# Correspondence: [andres.finzi@umontreal.ca](mailto:andres.finzi@umontreal.ca)

**Running Title: Antibody responses against SARS-CoV-2 S**

46 **Key Words:** Coronavirus, COVID-19, SARS-CoV-2, Spike glycoproteins, RBD, ELISA, IgM,  
47 IgG, neutralization, cross-reactivity

48

49 **Word Count for Abstract: 168**

50

51 **Total Character Count for the Manuscript: 21485**

52

53 **ABSTRACT**

54 The SARS-CoV-2 virus is responsible for the current worldwide coronavirus disease 2019  
55 (COVID-19) pandemic, infecting millions of people and causing hundreds of thousands of  
56 deaths. The Spike glycoprotein of SARS-CoV-2 mediates viral entry and is the main target for  
57 neutralizing antibodies. Understanding the antibody response directed against SARS-CoV-2 is  
58 crucial for the development of vaccine, therapeutic and public health interventions. Here we  
59 performed a cross-sectional study on 106 SARS-CoV-2-infected individuals to evaluate humoral  
60 responses against the SARS-CoV-2 Spike. The vast majority of infected individuals elicited anti-  
61 Spike antibodies within 2 weeks after the onset of symptoms. The levels of receptor-binding  
62 domain (RBD)-specific IgG persisted overtime, while the levels of anti-RBD IgM decreased  
63 after symptoms resolution. Some of the elicited antibodies cross-reacted with other human  
64 coronaviruses in a genus-restrictive manner. While most of individuals developed neutralizing  
65 antibodies within the first two weeks of infection, the level of neutralizing activity was  
66 significantly decreased over time. Our results highlight the importance of studying the  
67 persistence of neutralizing activity upon natural SARS-CoV-2 infection.

68

69 **MAIN**

70           The first step in the replication cycle of coronaviruses is viral entry. This is mediated by  
71 their trimeric Spike (S) glycoproteins. Similar to SARS-CoV, the S glycoprotein of SARS-CoV-  
72 2 interacts with angiotensin-converting enzyme 2 (ACE2) as its host receptor (Hoffmann et al.,  
73 2020; Shang et al., 2020; Walls et al., 2019). During entry, the Spike binds the host cell through  
74 interaction between its receptor binding domain (RBD) and ACE2 and is cleaved by cell surface  
75 proteases or endosomal cathepsins (Hoffmann et al., 2020; Ou et al., 2020; Zang et al., 2020),  
76 triggering irreversible conformational changes in the S protein enabling membrane fusion and  
77 viral entry (Walls et al., 2020; Wrapp et al., 2020). The SARS-CoV-2 Spike is very  
78 immunogenic, with RBD representing the main target for neutralizing antibodies (Ju et al., 2020;  
79 Shi et al., 2020; Wu et al., 2020; Yuan et al., 2020). Humoral responses are important for  
80 preventing and controlling viral infections (Murin et al., 2019; Rouse and Sehrawat, 2010).  
81 However, little is known about the chronology and durability of the human antibody response  
82 against SARS-CoV-2.

83  
84           Here we analyzed serological samples from 106 SARS-CoV-2-infected individuals at  
85 different times post-symptoms onset and 10 uninfected individuals for their reactivity to SARS-  
86 CoV-2 Spike glycoprotein, cross-reactivity with other human CoV (HCoV), as well as virus  
87 neutralization. Samples were collected from COVID-19 positive individuals starting on March  
88 2020 or healthy individuals before the COVID-19 outbreak (COVID-19 negative). Cross-  
89 sectional serum samples (n=79) were collected from individuals presenting typical clinical  
90 symptoms of acute SARS-CoV-2 infection (Table 1). All patients were positive for SARS-CoV-  
91 2 by RT-PCR on nasopharyngeal specimens. The average age of the infected patients was 55

92 years old, including 33 males and 46 females. Samples were classified into 4 different time  
93 points after symptoms onset: 24 (11 males, 13 females) were obtained at 2-7 days (T1, median =  
94 3 days), 20 (9 males, 11 females) between 8-14 days (T2, median = 11 days), 27 (10 males, 16  
95 females) between 16-30 days (T3, median = 23 days) and 9 (3 males, 6 females) between 31-43  
96 days (T4, median = 36 days). Samples were also obtained from 27 convalescent patients (20  
97 males, 7 females, median = 41 days), who have been diagnosed with or tested positive for  
98 COVID-19 with complete resolution of symptoms for at least 14 days.

99

100 We first evaluated the presence of RBD-specific IgG and IgM antibodies by ELISA  
101 (Amanat et al., 2020; Stadlbauer et al., 2020). The level of RBD-specific IgM peaked at T2 and  
102 was followed by a stepwise decrease over time (T3, T4 and Convalescent) (Figure 1). Three  
103 quarter of the patients had detectable anti-RBD IgM two weeks after the onset of the symptoms.  
104 Similarly, 85% of patients in T2 developed anti-RBD IgG, reaching 100% in convalescent  
105 patients. In contrast to IgM, the levels of RBD-specific IgG peaked at T3 and remained relatively  
106 stable after complete resolution of symptoms (convalescent patients).

107

108 We next used flow cytometry to examine the ability of sera to recognize the full-length  
109 SARS-CoV-2 Spike expressed at the cell surface. Briefly, 293T cells expressing SARS-CoV-2 S  
110 glycoproteins were stained with samples, followed by incubation with secondary antibodies  
111 recognizing all antibody isotypes (including IgG, IgM and IgA). As presented in Figure 2, 54.2%  
112 of the sera from T1 already contained SARS-CoV-2 full Spike-reactive antibodies. Interestingly,  
113 the majority of patients from T2, T3, T4 and convalescent groups were found to be seropositive  
114 in agreement with previous report (Grzelak et al., 2020). The higher seropositivity detected by

115 flow cytometry is most likely due to the detection of antibodies of multiple specificity and of  
116 different isotypes simultaneously. Antibody levels targeting the SARS-CoV-2 Spike significantly  
117 increased from T1 to T2/T3 and remained relatively stable thereafter. As expected, the levels of  
118 antibodies recognizing the full Spike correlated with the presence of both RBD-specific IgG and  
119 IgM (Figure S1). We also evaluated potential cross-reactivity against the closely related SARS-  
120 CoV Spike. None of the COVID-19 negative samples recognized the SARS-CoV Spike. While  
121 the reactivity of COVID-19+ samples to SARS-CoV S was lower than for SARS-CoV-2 S, it  
122 followed a similar progression and significantly correlated with their reactivity to SARS-CoV-2  
123 full Spike or RBD protein (Figure 2 and S1). This indicates that SARS-CoV-2-elicited antibodies  
124 cross-react with human *Sarbecoviruses*. This was also observed with another *Betacoronavirus*  
125 (OC43) but not with *Alphacoronavirus* (NL63, 229E) S glycoproteins, suggesting a genus-  
126 restrictive cross-reactivity (Figure 2C and S1). Of note, anti-OC43 RBD antibodies did not  
127 fluctuate upon SARS-CoV-2 infection (Figure S2). Therefore, this differential cross-reactivity  
128 could be explained by the high degree of conservation in the S protein fusion machinery,  
129 particularly in the S2 subunit among *Betacoronaviruses* (Jaimes et al., 2020; Madu et al., 2009;  
130 Zhou et al., 2020).

131  
132 We next measured the capacity of patient samples to neutralize pseudoparticles bearing  
133 SARS-CoV-2 S, SARS-CoV S or VSV-G glycoproteins using 293T cells stably expressing  
134 ACE2 as target cells (Figure 3 and S3). Neutralizing activity, as measured by the neutralization  
135 half-maximum inhibitory dilution (ID<sub>50</sub>) or the neutralization 80% inhibitory dilution (ID<sub>80</sub>), was  
136 detected in most patients within 2 weeks after the onset of symptoms (T2, T3, T4 and  
137 Convalescent patients) (Figure 3). SARS-CoV-2 neutralization was specific since no

138 neutralization was observed against pseudoparticles expressing VSV-G. The capacity to  
139 neutralize SARS-CoV-2 S-pseudotyped particles significantly correlated with the presence of  
140 RBD-specific IgG/IgM and anti-S antibodies (Figure S4). While the percentage of patients  
141 eliciting neutralizing antibodies against SARS-CoV-2 Spike remained relatively stable 2 weeks  
142 after disease symptom onset (T2, T3, T4 and Convalescent patients), neutralizing antibody titers  
143 significantly decreased after 1 month of infection (T4) or after the complete resolution of  
144 symptoms as observed in the convalescent patients (Figure 3G and 3H). Similarly to RBD-  
145 specific IgM, levels of RBD-specific IgA were also found to peak at T2 and decrease over time.  
146 However, RBD-specific IgM levels displayed a stronger correlation with neutralization activity  
147 compared to RBD-specific IgG and IgA, suggesting a more prominent role for IgM, but the  
148 decrease in IgA could also contribute to the loss of neutralization activity as recently suggested  
149 (Sterlin et al., 2020). Cross-reactive neutralizing antibodies against SARS-CoV S protein (Figure  
150 2B) were also detected in some SARS-CoV-2-infected individuals, but with significantly lower  
151 potency and waned over time. We note that around 40% of convalescent patients did not exhibit  
152 any neutralizing activity. This suggests that the production of neutralizing antibodies is not a  
153 prerequisite to the resolution of the infection and that other arms of the immune system could be  
154 sufficient to control the infection in an important proportion of the population.

155  
156 To determine whether underlying correlation patterns among antibody responses detected  
157 in SARS-CoV-2 infected individuals were associated with demographic and clinical parameters,  
158 we performed a comprehensive correlation analysis, focusing on data from the acute stages of  
159 SARS-CoV-2 infection (T1, T2, T3 and T4) (Figure 4 & S5). This analysis revealed a prominent  
160 cluster of positive correlations between SARS-CoV-2, SARS-CoV, and OC43 Spike antibody

161 binding, SARS-CoV-2 neutralization, and days post-symptoms onset (Figure S5). The cluster  
162 became evident in a linear correlation analysis involving all study parameters (Figure S5A). Of  
163 interest, clinical parameters formed another cluster of positive correlations between respiratory  
164 symptoms, hospitalization, oxygen supplementation and intensive care unit (ICU) admission  
165 (Figure S5A). The presence of respiratory symptoms and hospitalization also correlated with age  
166 of the infected patients. Studying the network of immunologic and clinical correlation pairs  
167 longitudinally (from T1 to T4), we observed an increased diversification of associations between  
168 the parameters (Figure 4B-E). Associations between anti-Spike Abs and clinical parameters  
169 enhanced overtime and was more prominent 3 weeks after the onset of the symptoms (T3 & T4).  
170 Admission to the ICU was significantly associated with levels of RBD-specific IgM and IgG and  
171 total SARS-CoV-2 Spike Abs (Figure 4A & S5A). The presence of respiratory symptoms was  
172 linked to higher levels of RBD-specific IgM and of neutralization activity against SARS-CoV-2  
173 S (Figure 4A). Indeed, neutralizers (patients with detectable neutralization ID<sub>50</sub> against SARS-  
174 CoV-2) were found to have stronger antibody responses and were more inclined to present  
175 respiratory symptoms (Figure S6).

176  
177 This study helps to better understand the kinetics and persistence of humoral responses  
178 directed against SARS-CoV-2 (Figure 1, 2 & 3). Our results reveal that the vast majority of  
179 infected individuals are able to elicit antibodies directed against SARS-CoV-2 Spike within 2  
180 weeks after symptom onset and persist after the resolution of the infection. Accordingly, all  
181 tested convalescent patients were found to be seropositive. As expected, RBD-specific IgM  
182 levels decreased over the duration of the study while IgG remained relatively stable. Our results  
183 highlight how SARS-CoV-2 Spike, like other coronaviruses, appears to be relatively easily



184 recognized by Abs present in sera from infected individuals. This was suggested to be linked to  
185 the higher processing of glycans compared to other type I fusion protein, such as HIV-1 Env,  
186 Influenza A HA or filoviruses GP (Watanabe et al., 2020a; Watanabe et al., 2020b). The ease of  
187 naturally-elicited Abs to recognize the Spike might be associated with the low rate of somatic  
188 hypermutation observed in neutralizing Abs (Ju et al., 2020). This low somatic hypermutation  
189 rate could in turn explain why the majority of the SARS-CoV-2 infected individuals are able to  
190 generate neutralizing antibodies within only two weeks after infection (Figure 3). In contrast, the  
191 development of potent neutralizing antibodies against HIV-1 Env usually requires 2-3 years of  
192 infection and require a high degree of somatic hypermutation (Sok and Burton, 2018).  
193 Nevertheless, in the case of SARS-CoV-2 infection, the neutralization capacity decreases  
194 significantly 6 weeks after the onset of symptoms, following a similar trend as anti-RBD IgM  
195 (Figure 1 & 3). Interestingly, anti-RBD IgM presented a stronger correlation with neutralization  
196 than IgG and IgA (Figure S4A,C), suggesting that at least part of the neutralizing activity is  
197 mediated by IgM. The neutralization activity appears to further decrease after the resolution of  
198 symptoms as recently reported in a series of longitudinal studies on convalescent patients  
199 (Beaudoin-Bussi eres et al., 2020; Ibarondo et al., 2020; Long et al., 2020; Perreault et al., 2020;  
200 Yin et al., 2020; Zhang et al., 2020). However, it remains unclear whether this reduced level of  
201 neutralizing activity would remain sufficient to protect from re-infection.

202

## 203 **AUTHOR CONTRIBUTIONS**

204 J.Prévost, J.R., B.S., R.B., M.R. and A.F. conceived the study. J.Prévost, J.R., A.F. designed  
205 experimental approaches; J.Prévost, G.B.B., R.G., A.Laumaea, J.R., S.P.A., G.G., M.B., S.D.,  
206 T.T., J.Perreault, A.Lewin., R.D. R.B., M.R., and A.F. performed, analyzed and interpreted the  
207 experiments; J.Prévost, G.B.B., J.R., H.M., G.G.-L., H.D.S., M.S.M., M.D., P.T., G.T.G.M.,  
208 M.Côté and A.F. contributed novel reagents; N.G., M.Carrier, D.M., A.P., M.L., A.B., V.L.,  
209 G.B., E.H., C.T., R.B. and M.R. collected clinical samples; J.Prévost, J.R. and A.F. wrote the  
210 paper. Every author has read edited and approved the final manuscript.

211

## 212 **ACKNOWLEDGMENTS**

213 The authors thank the CRCHUM BSL3 and Flow Cytometry Platforms for technical assistance.  
214 We thank Dr Florian Krammer (Icahn School of Medicine at Mount Sinai, NY) for the plasmid  
215 expressing the SARS-CoV-2 RBD domain, Dr Stefan Pöhlmann (Georg-August University,  
216 Germany) for the plasmids coding for SARS-CoV S, SARS-CoV-2 S and HCoV 229E and NL63  
217 S glycoproteins and Dr M. Gordon Joyce (U.S. MHRP) for the monoclonal antibody CR3022.  
218 We also thank Danka K Shank and Melina Bélanger Collard from the Laboratoire de Santé  
219 Publique du Québec for their help in preparing the specimens. This work was supported by le  
220 Ministère de l'Économie et de l'Innovation du Québec, Programme de soutien aux organismes  
221 de recherche et d'innovation to A.F and by the Fondation du CHUM. This work was also  
222 supported by a CIHR foundation grant #352417 to A.F. Development of SARS-CoV-2 reagents  
223 was partially supported by the NIAID Centers of Excellence for Influenza Research and  
224 Surveillance (CEIRS) contract HHSN272201400008C. A.F. is the recipient of a Canada  
225 Research Chair on Retroviral Entry # RCHS0235 950-232424. R.D. was supported by NIH grant

226 R01 AI122953-05. M.C. is the recipient of a Tier II Canada Research Chair in Molecular  
227 Virology and Antiviral Therapeutics and an Ontario's Early Researcher Award. J.P., G.B.B. and  
228 S.P.A are supported by CIHR fellowships. R.G. is supported by a MITACS Accélération  
229 postdoctoral fellowship. M.S.M was supported in part by a CIHR New Investigator Award, and  
230 Ontario Early Researcher Award, CIHR COVID Rapid Response Funding, and the W. Garfield  
231 Weston Foundation Weston Family Microbiome Initiative. The funders had no role in study  
232 design, data collection and analysis, decision to publish, or preparation of the manuscript.

233

#### 234 **COMPETING INTERESTS**

235 The authors declare no competing interests.

236

237 **STAR METHODS**

238

239 **Ethics statement**

240 All work was conducted in accordance with the Declaration of Helsinki in terms of informed  
241 consent and approval by an appropriate institutional board. In addition, this study was conducted  
242 in accordance with the rules and regulations concerning ethical reviews in Quebec, particularly  
243 those specified in the Civil Code (<http://legisquebec.gouv.qc.ca/fr/ShowDoc/cs/CCQ-1991>) and  
244 in subsequent IRB practice. Informed Consent was obtained for all participating subjects and the  
245 study was approved by Quebec Public health authorities. Convalescent plasmas were obtained  
246 from donors who consented to participate in this research project (REB # 2020-004). The donors  
247 were recruited by Héma-Québec and met all donor eligibility criteria for routine apheresis  
248 plasma donation, plus two additional criteria: previous confirmed COVID-19 infection and  
249 complete resolution of symptoms for at least 14 days. Plasma samples from COVID- children  
250 were obtained from donors enrolled in a research protocol from CHU Ste-Justine (REB #3195).

251

252 **Plasmids**

253 The plasmids expressing the human coronavirus Spikes of SARS-CoV-2, SARS-CoV, NL63 and  
254 229E were previously reported (Hoffmann et al., 2020; Hofmann et al., 2005). The OC43 Spike  
255 with an N-terminal 3xFlag tag and C-terminal 17 residue deletion was cloned into pCAGGS  
256 following amplification of the spike gene from pB-Cyst-3FlagOC43SC17 (kind gift of James M.  
257 Rini, University of Toronto, ON, Canada). The plasmid encoding for SARS-CoV-2 S RBD  
258 (residues 319-541) fused with a hexahistidine tag was reported elsewhere (Amanat et al., 2020).  
259 The sequence for the HCoV OC43 RBD was obtained from the UniProt Protein Database

260 (P36334 SPIKE\_CVHOC). An N-terminal 13aa signal sequence and a C-terminal His-tag were  
261 added for downstream protein purification. Mammalian cell codon optimization was performed  
262 using the GenScript GenSmart Codon Optimization Tool. The RBD gene was synthesized by  
263 GenScript and cloned into the pcDNA3.1 plasmid between EcoRI and XhoI sites. The vesicular  
264 stomatitis virus G (VSV-G)-encoding plasmid (pSVCMV-IN-VSV-G) was previously described  
265 (Lodge et al., 1997). The lentiviral packaging plasmids pLP1 and pLP2, coding for HIV-1  
266 gag/pol and rev respectively, were purchased from Invitrogen. The transfer plasmid (pLenti-C-  
267 mGFP-P2A-Puro-ACE2) encoding for human angiotensin converting enzyme 2 (ACE2) fused  
268 with a mGFP C-terminal tag and a puromycin selection marker was purchased from OriGene.

269

## 270 **Cell lines**

271 293T human embryonic kidney cells (obtained from ATCC) were maintained at 37°C under 5%  
272 CO<sub>2</sub> in Dulbecco's modified Eagle's medium (DMEM) (Wisent) containing 5% fetal bovine  
273 serum (VWR) and 100 µg/ml of penicillin-streptomycin (Wisent). For the generation of 293T  
274 cells stably expressing human ACE2, transgenic lentivirus were produced in 293T using a third-  
275 generation lentiviral vector system. Briefly, 293T cells were co-transfected with two packaging  
276 plasmids (pLP1 and pLP2), an envelope plasmid (pSVCMV-IN-VSV-G) and a lentiviral transfer  
277 plasmid coding for human ACE2 (pLenti-C-mGFP-P2A-Puro-ACE2) (OriGene). Forty-eight  
278 hours post-transfection, supernatant containing lentiviral particles was used to infect more 293T  
279 cells in presence of 5µg/mL polybrene. Stably transduced cells were enriched upon puromycin  
280 selection. 293T-ACE2 cells were then cultured in a medium supplemented with 2 µg/ml of  
281 puromycin (Sigma).

282

## 283 **Protein expression and purification**

284 FreeStyle 293F cells (Invitrogen) were grown in FreeStyle 293F medium (Invitrogen) to a  
285 density of  $1 \times 10^6$  cells/mL at 37°C with 8 % CO<sub>2</sub> with regular agitation (150 rpm). Cells were  
286 transfected with a plasmid coding for SARS-CoV-2 S RBD or OC43 S RBD using  
287 ExpiFectamine 293 transfection reagent, as directed by the manufacturer (Invitrogen). One week  
288 later, cells were pelleted and discarded. Supernatants were filtered using a 0.22 µm filter  
289 (Thermo Fisher Scientific). The recombinant RBD proteins were purified by nickel affinity  
290 columns, as directed by the manufacturer (Invitrogen). The RBD preparations were dialyzed  
291 against phosphate-buffered saline (PBS) and stored in aliquots at -80°C until further use. To  
292 assess purity, recombinant proteins were loaded on SDS-PAGE gels and stained with Coomassie  
293 Blue. For cell-surface staining, RBD proteins were fluorescently labelled with Alexa Fluor 594  
294 (Invitrogen) according to the manufacturer's protocol.

295

## 296 **Sera and antibodies**

297 Sera from SARS-CoV-2-infected and uninfected donors were collected, heat-inactivated for 1  
298 hour at 56 °C and stored at -80°C until ready to use in subsequent experiments. The monoclonal  
299 antibodies CR3022 and 4.3E4 were used as positive controls in ELISA assays and were  
300 previously described (Desforges et al., 2013; ter Meulen et al., 2006; Tian et al., 2020; Yuan et  
301 al., 2020). Horseradish peroxidase (HRP)-conjugated antibody specific for the Fc region of  
302 human IgG (Invitrogen), for the Fc region of human IgM (Jackson ImmunoResearch) or for the  
303 Fc region of human IgA (Jackson ImmunoResearch) were used as secondary antibodies to detect  
304 sera binding in ELISA experiments. Alexa Fluor-647-conjugated goat anti-human IgG (H+L)  
305 Abs (Invitrogen) were used as secondary antibodies to detect sera binding in flow cytometry

306 experiment. Polyclonal goat anti-ACE2 (R&D systems) and Alexa-Fluor-conjugated donkey  
307 anti-goat IgG Abs (Invitrogen) were used to detect cell-surface expression of human ACE2.

308

### 309 **ELISA assay**

310 Recombinant SARS-CoV-2 S RBD proteins (or OC43 S RBD proteins) (2.5  $\mu$ g/ml), or bovine  
311 serum albumin (BSA) (2.5  $\mu$ g/ml) as a negative control, were prepared in PBS and were  
312 adsorbed to plates (MaxiSorp; Nunc) overnight at 4°C. Coated wells were subsequently blocked  
313 with blocking buffer (Tris-buffered saline [TBS] containing 0.1% Tween20 and 2% BSA) for 1h  
314 at room temperature. Wells were then washed four times with washing buffer (Tris-buffered  
315 saline [TBS] containing 0.1% Tween20). CR3022 mAb (50ng/ml) or sera from SARS-CoV-2-  
316 infected or uninfected donors (1/100; 1/250; 1/500; 1/1000; 1/2000; 1/4000) were diluted in  
317 blocking buffer and incubated with the RBD-coated wells for 1h at room temperature. Plates  
318 were washed four times with washing buffer followed by incubation with secondary Abs (diluted  
319 in blocking buffer) for 1h at room temperature, followed by four washes. HRP enzyme activity  
320 was determined after the addition of a 1:1 mix of Western Lightning oxidizing and luminol  
321 reagents (Perkin Elmer Life Sciences). Light emission was measured with a LB941 TriStar  
322 luminometer (Berthold Technologies). Signal obtained with BSA was subtracted for each serum  
323 and were then normalized to the signal obtained with CR3022 mAb present in each plate.  
324 Alternatively, the signal obtained with each serum on OC43 RBD was normalized with the  
325 signal obtained with 4.3E4 mAb present in each plate. The seropositivity threshold was  
326 established using the following formula: mean RLU of all COVID-19 negative sera normalized  
327 to CR3022 (or 4.3E4) + (3 standard deviations of the mean of all COVID-19 negative sera).

328

329 **Flow cytometry analysis of cell-surface staining**

330 Using the standard calcium phosphate method, 10 $\mu$ g of Spike expressor and 2 $\mu$ g of a green  
331 fluorescent protein (GFP) expressor (pIRES-GFP) was transfected into  $2 \times 10^6$  293T cells. At  
332 48h post transfection, 293T cells were stained with sera from SARS-CoV-2-infected or  
333 uninfected individuals (1:250 dilution). The percentage of transfected cells (GFP+ cells) was  
334 determined by gating the living cell population based on the basis of viability dye staining (Aqua  
335 Vivid, Invitrogen). Samples were acquired on a LSRII cytometer (BD Biosciences, Mississauga,  
336 ON, Canada) and data analysis was performed using FlowJo vX.0.7 (Tree Star, Ashland, OR,  
337 USA). The seropositivity threshold was established using the following formula: (mean of all  
338 COVID-19 negative sera + (3 standard deviation of the mean of all COVID-19 negative sera) +  
339 inter-assay coefficient of variability).

340

341 **Virus neutralization assay**

342 Target cells were infected with single-round luciferase-expressing lentiviral particles. Briefly,  
343 293T cells were transfected by the calcium phosphate method with the lentiviral vector pNL4.3  
344 R-E- Luc (NIH AIDS Reagent Program) and a plasmid encoding for SARS-CoV-2 Spike,  
345 SARS-CoV Spike or VSV-G at a ratio of 5:4. Two days post-transfection, cell supernatants were  
346 harvested and stored at  $-80^{\circ}\text{C}$  until use. 293T-ACE2 target cells were seeded at a density of  
347  $1 \times 10^4$  cells/well in 96-well luminometer-compatible tissue culture plates (Perkin Elmer) 24h  
348 before infection. Recombinant viruses in a final volume of 100 $\mu$ l were incubated with the  
349 indicated sera dilutions (1/50; 1/250; 1/1250; 1/6250; 1/31250) for 1h at  $37^{\circ}\text{C}$  and were then  
350 added to the target cells followed by incubation for 48h at  $37^{\circ}\text{C}$ ; cells were lysed by the addition  
351 of 30 $\mu$ l of passive lysis buffer (Promega) followed by one freeze-thaw cycle. An LB941 TriStar



352 luminometer (Berthold Technologies) was used to measure the luciferase activity of each well  
353 after the addition of 100µl of luciferin buffer (15mM MgSO<sub>4</sub>, 15mM KPO<sub>4</sub> [pH 7.8], 1mM ATP,  
354 and 1mM dithiothreitol) and 50µl of 1mM d-luciferin potassium salt (Prolume). The  
355 neutralization half-maximal inhibitory dilution (ID<sub>50</sub>) or the neutralization 80% inhibitory  
356 dilution (ID<sub>80</sub>) represents the sera dilution to inhibit 50% or 80% of the infection of 293T-ACE2  
357 cells by recombinant viruses bearing the indicated surface glycoproteins.

358

### 359 **Software Scripts and Visualization**

360 Correlograms were generated using the corrplot package in program R and R Studio (R Core  
361 Team, 2013; R Studio Team, 2015). Dendrograms were calculated using the dendPlot function  
362 and hclust method, or as implemented in the heatmap package in R. Chord diagrams were  
363 generated in R and R Studio based on the circlize and ComplexHeatmap package, as recently  
364 described. For time series, area graphs were generated using RawGraphs with DensityDesign  
365 interpolation and the implemented normalization using vertically un-centered values (Mauri et  
366 al., 2017). Forrest plots and calculations of fold change, significance (Mann-Whitney) and  
367 adjusted P values (Holm-Sidak) were done using Excel and Prism v8.2.0. The confidence  
368 interval of a quotient of two means was calculated based on the Fieller method using GraphPad  
369 QuickCalcs.

370

### 371 **Statistical analyses**

372 Statistics were analyzed using GraphPad Prism version 8.0.2 (GraphPad, San Diego, CA, (USA)).  
373 Every data set was tested for statistical normality and this information was used to apply the  
374 appropriate (parametric or nonparametric) statistical test. P values <0.05 were considered

375 significant; significance values are indicated as \*  $P < 0.05$ , \*\*  $P < 0.01$ , \*\*\*  $P < 0.001$ , \*\*\*\*  
376  $P < 0.0001$ . Corrections for multiple comparisons were performed with the Holm-Sidak method.

377 **REFERENCES**

- 378 Amanat, F., Stadlbauer, D., Strohmeier, S., Nguyen, T.H.O., Chromikova, V., McMahon, M.,  
379 Jiang, K., Arunkumar, G.A., Jurczyszak, D., Polanco, J., *et al.* (2020). A serological assay to  
380 detect SARS-CoV-2 seroconversion in humans. *Nat Med*.
- 381 Beaudoin-Bussi eres, G., Laumaea, A., Anand, S.P., Pr evost, J., Gasser, R., Goyette, G.,  
382 Medjahed, H., Perreault, J., Tremblay, T., Lewin, A., *et al.* (2020). Decline of humoral responses  
383 against SARS-CoV-2 Spike in convalescent individuals. *bioRxiv*.
- 384 Desforges, M., Desjardins, J., Zhang, C., and Talbot, P.J. (2013). The acetyl-esterase activity of  
385 the hemagglutinin-esterase protein of human coronavirus OC43 strongly enhances the production  
386 of infectious virus. *J Virol* 87, 3097-3107.
- 387 Grzelak, L., Temmam, S., Planchais, C., Demeret, C., Huon, C., Guivel, F., Staropoli, I., Chazal,  
388 M., Dufloo, J., Planas, D., *et al.* (2020). SARS-CoV-2 serological analysis of COVID-19  
389 hospitalized patients, pauci-symptomatic individuals and blood donors. *medRxiv*.
- 390 Hoffmann, M., Kleine-Weber, H., Schroeder, S., Kruger, N., Herrler, T., Erichsen, S.,  
391 Schiergens, T.S., Herrler, G., Wu, N.H., Nitsche, A., *et al.* (2020). SARS-CoV-2 Cell Entry  
392 Depends on ACE2 and TMPRSS2 and Is Blocked by a Clinically Proven Protease Inhibitor. *Cell*  
393 181, 271-280 e278.
- 394 Hofmann, H., Pyrc, K., van der Hoek, L., Geier, M., Berkhout, B., and Pohlmann, S. (2005).  
395 Human coronavirus NL63 employs the severe acute respiratory syndrome coronavirus receptor  
396 for cellular entry. *Proc Natl Acad Sci U S A* 102, 7988-7993.
- 397 Ibarondo, F.J., Fulcher, J.A., Goodman-Meza, D., Elliott, J., Hofmann, C., Hausner, M.A.,  
398 Ferbas, K.G., Tobin, N.H., Aldrovandi, G.M., and Yang, O.O. (2020). Rapid Decay of Anti-  
399 SARS-CoV-2 Antibodies in Persons with Mild Covid-19. *New England Journal of Medicine*.
- 400 Jaimes, J.A., Andre, N.M., Chappie, J.S., Millet, J.K., and Whittaker, G.R. (2020). Phylogenetic  
401 Analysis and Structural Modeling of SARS-CoV-2 Spike Protein Reveals an Evolutionary  
402 Distinct and Proteolytically Sensitive Activation Loop. *J Mol Biol* 432, 3309-3325.
- 403 Ju, B., Zhang, Q., Ge, J., Wang, R., Sun, J., Ge, X., Yu, J., Shan, S., Zhou, B., Song, S., *et al.*  
404 (2020). Human neutralizing antibodies elicited by SARS-CoV-2 infection. *Nature*.
- 405 Lodge, R., Lalonde, J.P., Lemay, G., and Cohen, E.A. (1997). The membrane-proximal  
406 intracytoplasmic tyrosine residue of HIV-1 envelope glycoprotein is critical for basolateral  
407 targeting of viral budding in MDCK cells. *EMBO J* 16, 695-705.
- 408 Long, Q.X., Tang, X.J., Shi, Q.L., Li, Q., Deng, H.J., Yuan, J., Hu, J.L., Xu, W., Zhang, Y., Lv,  
409 F.J., *et al.* (2020). Clinical and immunological assessment of asymptomatic SARS-CoV-2  
410 infections. *Nat Med*.
- 411 Madu, I.G., Roth, S.L., Belouzard, S., and Whittaker, G.R. (2009). Characterization of a highly  
412 conserved domain within the severe acute respiratory syndrome coronavirus spike protein S2  
413 domain with characteristics of a viral fusion peptide. *J Virol* 83, 7411-7421.
- 414 Mauri, M., Elli, T., Caviglia, G., Uboldi, G., and Azzi, M. (2017). RAWGraphs: A Visualisation  
415 Platform to Create Open Outputs. In *Proceedings of the 12th Biannual Conference on Italian*  
416 *SIGCHI Chapter* (New York, NY: ACM), p. 5.
- 417 Murin, C.D., Wilson, I.A., and Ward, A.B. (2019). Antibody responses to viral infections: a  
418 structural perspective across three different enveloped viruses. *Nat Microbiol* 4, 734-747.
- 419 Ou, X., Liu, Y., Lei, X., Li, P., Mi, D., Ren, L., Guo, L., Guo, R., Chen, T., Hu, J., *et al.* (2020).  
420 Characterization of spike glycoprotein of SARS-CoV-2 on virus entry and its immune cross-  
421 reactivity with SARS-CoV. *Nat Commun* 11, 1620.

422 Perreault, J., Tremblay, T., Fournier, M.-J., Drouin, M., Beaudoin-Bussi eres, G., Pr evost, J.,  
423 Lewin, A., B egin, P., Finzi, A., and Bazin, R. (2020). Longitudinal analysis of the humoral  
424 response to SARS-CoV-2 spike RBD in convalescent plasma donors. *bioRxiv*.  
425 R Core Team (2013). R: A language and environment for statistical computing. In R Foundation  
426 for Statistical Computing (Vienna, Austria).  
427 R Studio Team (2015). RStudio: Integrated Development for R. RStudio, Inc. (Boston, MA).  
428 Rouse, B.T., and Sehrawat, S. (2010). Immunity and immunopathology to viruses: what decides  
429 the outcome? *Nat Rev Immunol* 10, 514-526.  
430 Shang, J., Ye, G., Shi, K., Wan, Y., Luo, C., Aihara, H., Geng, Q., Auerbach, A., and Li, F.  
431 (2020). Structural basis of receptor recognition by SARS-CoV-2. *Nature*.  
432 Shi, R., Shan, C., Duan, X., Chen, Z., Liu, P., Song, J., Song, T., Bi, X., Han, C., Wu, L., *et al.*  
433 (2020). A human neutralizing antibody targets the receptor binding site of SARS-CoV-2. *Nature*.  
434 Sok, D., and Burton, D.R. (2018). Recent progress in broadly neutralizing antibodies to HIV. *Nat*  
435 *Immunol* 19, 1179-1188.  
436 Stadlbauer, D., Amanat, F., Chromikova, V., Jiang, K., Strohmeier, S., Arunkumar, G.A., Tan,  
437 J., Bhavsar, D., Capuano, C., Kirkpatrick, E., *et al.* (2020). SARS-CoV-2 Seroconversion in  
438 Humans: A Detailed Protocol for a Serological Assay, Antigen Production, and Test Setup. *Curr*  
439 *Protoc Microbiol* 57, e100.  
440 Sterlin, D., Mathian, A., Miyara, M., Mohr, A., Anna, F., Claer, L., Quentric, P., Fadlallah, J.,  
441 Ghillani, P., Gunn, C., *et al.* (2020). IgA dominates the early neutralizing antibody response to  
442 SARS-CoV-2. *medRxiv*.  
443 ter Meulen, J., van den Brink, E.N., Poon, L.L., Marissen, W.E., Leung, C.S., Cox, F., Cheung,  
444 C.Y., Bakker, A.Q., Bogaards, J.A., van Deventer, E., *et al.* (2006). Human monoclonal antibody  
445 combination against SARS coronavirus: synergy and coverage of escape mutants. *PLoS Med* 3,  
446 e237.  
447 Tian, X., Li, C., Huang, A., Xia, S., Lu, S., Shi, Z., Lu, L., Jiang, S., Yang, Z., Wu, Y., *et al.*  
448 (2020). Potent binding of 2019 novel coronavirus spike protein by a SARS coronavirus-specific  
449 human monoclonal antibody. *Emerg Microbes Infect* 9, 382-385.  
450 Walls, A.C., Park, Y.J., Tortorici, M.A., Wall, A., McGuire, A.T., and Velesler, D. (2020).  
451 Structure, Function, and Antigenicity of the SARS-CoV-2 Spike Glycoprotein. *Cell* 181, 281-  
452 292 e286.  
453 Walls, A.C., Xiong, X., Park, Y.J., Tortorici, M.A., Snijder, J., Quispe, J., Cameroni, E., Gopal,  
454 R., Dai, M., Lanzavecchia, A., *et al.* (2019). Unexpected Receptor Functional Mimicry  
455 Elucidates Activation of Coronavirus Fusion. *Cell* 176, 1026-1039 e1015.  
456 Watanabe, Y., Allen, J.D., Wrapp, D., McLellan, J.S., and Crispin, M. (2020a). Site-specific  
457 glycan analysis of the SARS-CoV-2 spike. *Science*.  
458 Watanabe, Y., Berndsen, Z.T., Raghwani, J., Seabright, G.E., Allen, J.D., Pybus, O.G.,  
459 McLellan, J.S., Wilson, I.A., Bowden, T.A., Ward, A.B., *et al.* (2020b). Vulnerabilities in  
460 coronavirus glycan shields despite extensive glycosylation. *Nat Commun* 11, 2688.  
461 Wrapp, D., Wang, N., Corbett, K.S., Goldsmith, J.A., Hsieh, C.L., Abiona, O., Graham, B.S.,  
462 and McLellan, J.S. (2020). Cryo-EM structure of the 2019-nCoV spike in the prefusion  
463 conformation. *Science* 367, 1260-1263.  
464 Wu, Y., Wang, F., Shen, C., Peng, W., Li, D., Zhao, C., Li, Z., Li, S., Bi, Y., Yang, Y., *et al.*  
465 (2020). A noncompeting pair of human neutralizing antibodies block COVID-19 virus binding to  
466 its receptor ACE2. *Science*.

467 Yin, S., Tong, X., Huang, A., Shen, H., Li, Y., Liu, Y., Wu, C., Huang, R., and Chen, Y. (2020).  
468 Longitudinal anti-SARS-CoV-2 antibody profile and neutralization activity of a COVID-19  
469 patient. *J Infect.*

470 Yuan, M., Wu, N.C., Zhu, X., Lee, C.D., So, R.T.Y., Lv, H., Mok, C.K.P., and Wilson, I.A.  
471 (2020). A highly conserved cryptic epitope in the receptor binding domains of SARS-CoV-2 and  
472 SARS-CoV. *Science* 368, 630-633.

473 Zang, R., Gomez Castro, M.F., McCune, B.T., Zeng, Q., Rothlauf, P.W., Sonnek, N.M., Liu, Z.,  
474 Brulois, K.F., Wang, X., Greenberg, H.B., *et al.* (2020). TMPRSS2 and TMPRSS4 promote  
475 SARS-CoV-2 infection of human small intestinal enterocytes. *Sci Immunol* 5.

476 Zhang, G., Nie, S., Zhang, Z., and Zhang, Z. (2020). Longitudinal Change of Severe Acute  
477 Respiratory Syndrome Coronavirus 2 Antibodies in Patients with Coronavirus Disease 2019. *J*  
478 *Infect Dis* 222, 183-188.

479 Zhou, H., Chen, X., Hu, T., Li, J., Song, H., Liu, Y., Wang, P., Liu, D., Yang, J., Holmes, E.C.,  
480 *et al.* (2020). A Novel Bat Coronavirus Closely Related to SARS-CoV-2 Contains Natural  
481 Insertions at the S1/S2 Cleavage Site of the Spike Protein. *Curr Biol.*

482

483 **Figure Legends**

484 **Table 1. Cross-sectional SARS-CoV-2 cohort clinical characteristics**

485

486 **Figure 1. Detection of SARS-CoV-2 RBD-specific IgM and IgG over time.**

487 Indirect ELISA was performed using recombinant SARS-CoV-2 RBD and incubated with  
488 samples from COVID-19 negative or COVID-19 positive patients at different times after  
489 symptoms onset (T1, T2, T3, T4, Convalescent). Anti-RBD binding was detected using (A-C)  
490 anti-IgM-HRP or (D-F) anti-IgG-HRP. Relative light units (RLU) obtained with BSA (negative  
491 control) were subtracted and further normalized to the signal obtained with the anti-RBD  
492 CR3022 mAb present in each plate. Data in graphs (A, D) represent RLU done in quadruplicate.  
493 Curves depicted in (B, E) represent the mean RLU detected with all samples from the same  
494 group. Undetectable measures are represented as white symbols and limits of detection are  
495 plotted. (C, F) Areas under the curve (AUC) were calculated based on RLU datasets shown in  
496 (A, D) using GraphPad Prism software. Statistical significance was tested using Kruskal-Wallis  
497 tests with a Dunn's post-test (\*  $p < 0.05$ ; \*\*  $p < 0.01$ ; \*\*\*  $p < 0.001$ ; \*\*\*\*  $p < 0.0001$ ).

498

499 **Figure 2. SARS-CoV-2 infection elicits cross-reactive antibodies against other human**

500 ***Betacoronaviruses.***

501 Cell-surface staining of 293T cells expressing full-length Spike (S) from different HCoV (A)  
502 SARS-CoV-2, (B) SARS-CoV, (C) OC43, NL63 and 229E with samples from COVID-19  
503 negative or COVID-19 positive patients at different stage of infection (T1, T2, T3, T4,  
504 Convalescent). The graphs shown represent the median fluorescence intensities (MFI).  
505 Undetectable measures are represented as white symbols and limits of detection are plotted.

506 Error bars indicate means  $\pm$  SEM. Statistical significance was tested using Kruskal-Wallis tests  
507 with a Dunn's post-test (\*  $p < 0.05$ ; \*\*  $p < 0.01$ ; \*\*\*  $p < 0.001$ ; \*\*\*\*  $p < 0.0001$ ).

508

509 **Figure 3. Anti-Spike neutralizing antibody titers decrease over time.**

510 Pseudoviral particles coding for the luciferase reporter gene and bearing the following  
511 glycoproteins: (A, D, G, H) SARS-CoV-2 S, (B, E, I) SARS-CoV S or (C, F) VSV-G were used  
512 to infect 293T-ACE2 cells. Pseudoviruses were incubated with serial dilutions of samples from  
513 COVID-19 negative or COVID-19 positive patients (T1, T2, T3, T4, Convalescent) at 37°C for  
514 1h prior to infection of 293T-ACE2 cells. Infectivity at each dilution was assessed in duplicate  
515 and is shown as the percentage of infection without sera for each glycoprotein. (G, I)  
516 Neutralization half maximal inhibitory serum dilution (ID<sub>50</sub>) and (H) ID<sub>80</sub> values were  
517 determined using a normalized non-linear regression using Graphpad Prism software.  
518 Undetectable measures are represented as white symbols. Neutralizer represent patients with (G,  
519 I) an ID<sub>50</sub> over 100 or (H) an ID<sub>80</sub>. Statistical significance was tested using Mann-Whitney U  
520 tests (\*  $p < 0.05$ ; \*\*  $p < 0.01$ ).

521 **Figure 4. Association between clinical and serological parameters in SARS-CoV-2-infected**  
522 **patients.**

523 Chord diagram illustrating the network of linear correlations among nine major serological and  
524 clinical factors for (A) all acutely infected individuals (T1, T2, T3 and T4) or (B-E) at different  
525 time points. Chords are color-coded according to the magnitude of the correlation coefficient (r);  
526 chord width inversely corresponds to the P-value. Asterisks indicate all statistically significant  
527 correlations within chords (\* $P < 0.05$ , \*\* $P < 0.01$ , \*\*\* $P < 0.005$ ). (A-E) Correlation analysis was  
528 done using nonparametric Spearman rank tests. P-values were adjusted for multiple comparisons

529 using Holm-Sidak ( $\alpha = 0.05$ ). Statistical comparisons of two parameters were done using Mann-  
530 Whitney U tests.  
531



**Table 1. Cross-sectional SARS-CoV-2 cohort**

| Group        | n  | Days after onset of symptoms<br>(median; day range) | Age<br>(median; age range) | Gender   |            |
|--------------|----|-----------------------------------------------------|----------------------------|----------|------------|
|              |    |                                                     |                            | Male (n) | Female (n) |
| T1           | 24 | 3<br>(2-7)                                          | 50<br>(31-94)              | 11       | 13         |
| T2           | 20 | 11<br>(8-14)                                        | 64<br>(34-90)              | 9        | 11         |
| T3           | 26 | 22<br>(16-30)                                       | 40<br>(20-93)              | 10       | 16         |
| T4           | 9  | 36<br>(31-43)                                       | 39<br>(24-87)              | 3        | 6          |
| Convalescent | 27 | 41<br>(23-52)                                       | 37<br>(19-69)              | 20       | 7          |

— COVID-19-      — COVID-19+ (T2)      — COVID-19+ (T4)  
 — COVID-19+ (T1)      — COVID-19+ (T3)      — COVID-19+ (Conv.)

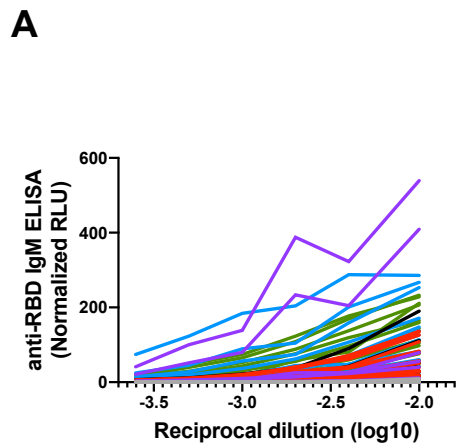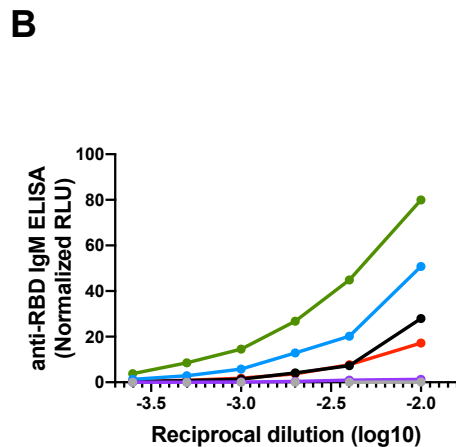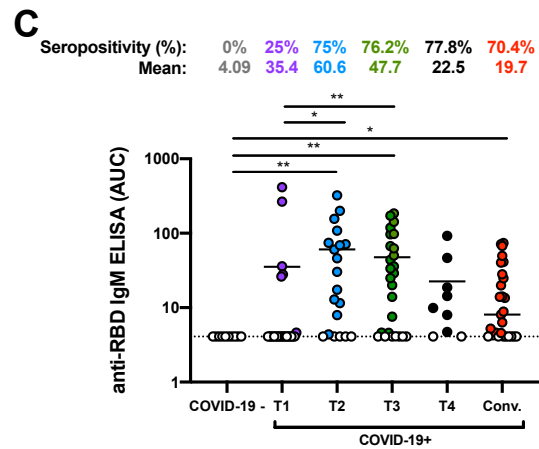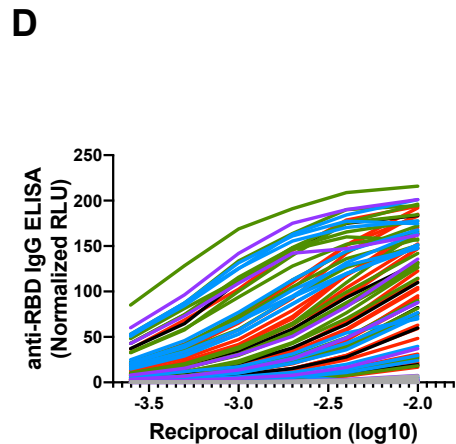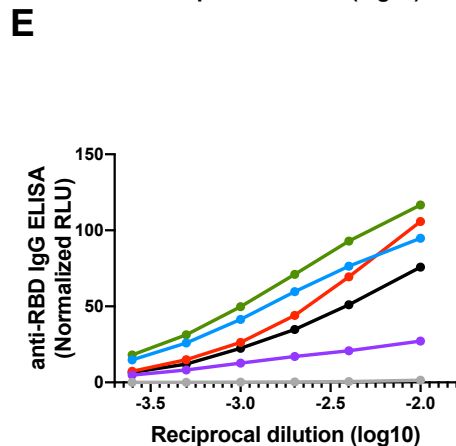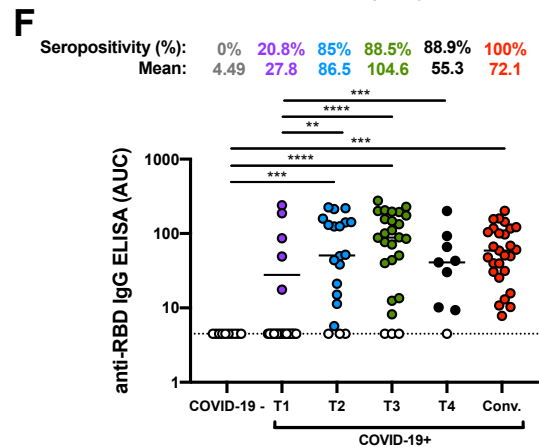

A

## SARS-CoV-2 S

Seropositivity (%): 0% 54.2% 90.0% 92.3% 100% 100%  
 Mean: 232 4038 14980 16742 7309 12717

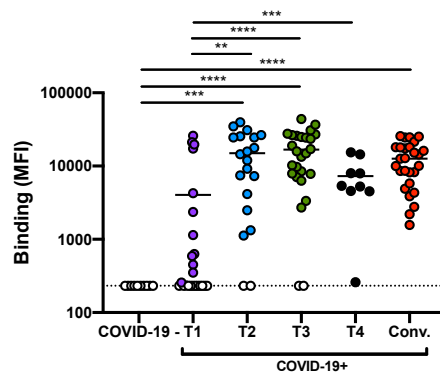

B

## SARS-CoV S

Seropositivity (%): 0% 41.7% 85% 92.3% 88.9% 92.6%  
 Mean: 232 632.1 1739 1996 1020 1400

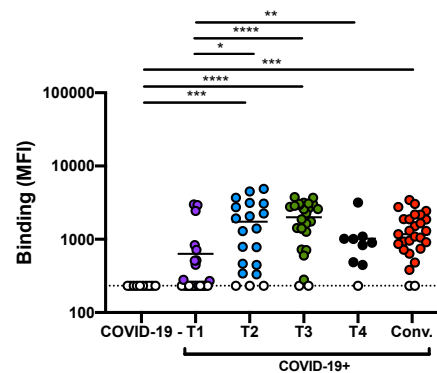

C

## OC43 S

Seropositivity (%): 100% 100% 100% 100% 100% 100%  
 Mean: 1859 4104 7118 9494 7329 6184

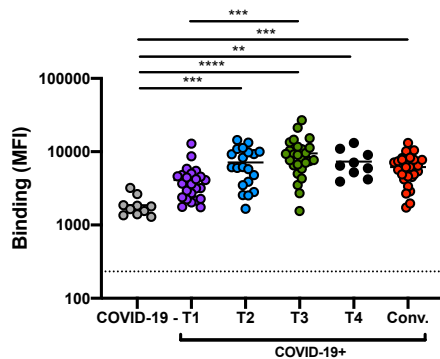

## NL63 S

Seropositivity (%): 10% 0% 5% 0% 0% 0%  
 Mean: 233.2 232 243.8 232 232 232

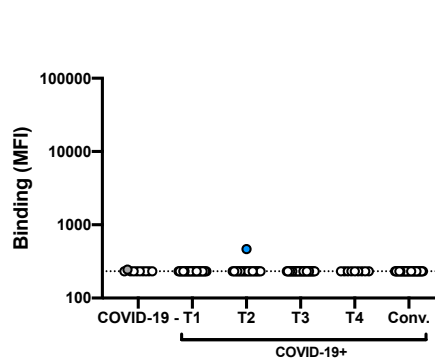

## 229E S

Seropositivity (%): 40% 79.2% 75% 85.2% 77.8% 31.4%  
 Mean: 252.1 307 353.1 345.4 311.7 263.8

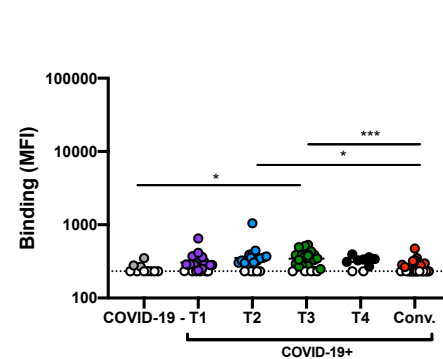

— COVID-19-      — COVID-19+ (T2)      — COVID-19+ (T4)  
 — COVID-19+ (T1)      — COVID-19+ (T3)      — COVID-19+ (Conv.)

**A**

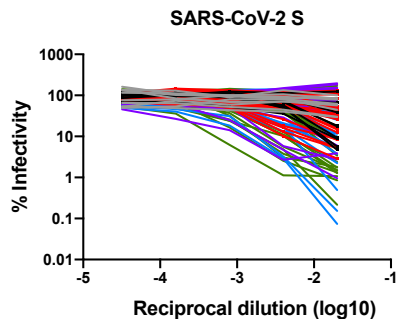

**B**

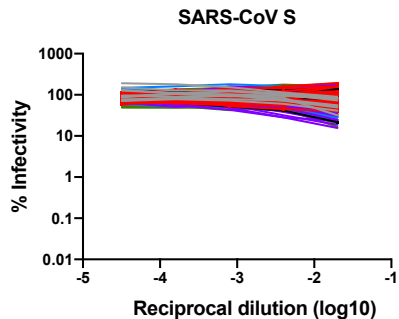

**C**

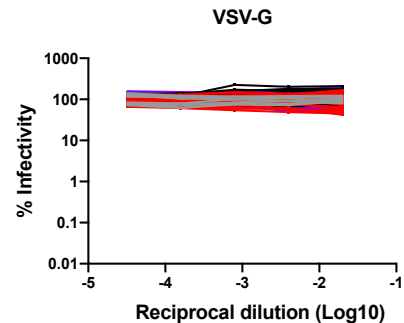

**D**

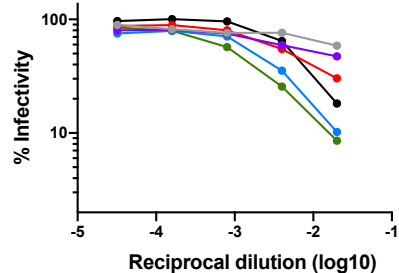

**E**

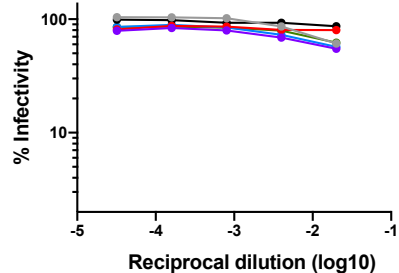

**F**

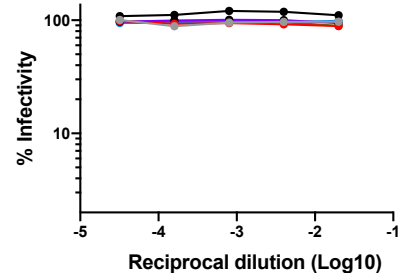

**G**

**SARS-CoV-2 S**

Neutralizer (%): 20% 29.2% 65% 65.4% 66.7% 59.3%  
 Mean Neutralizer: 2663 4228 2665 3101 335.2 596.2

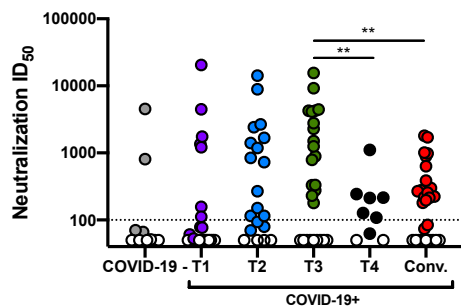

**H**

**SARS-CoV-2 S**

Neutralizer (%): 20% 20.8% 50% 61.5% 44.4% 51.9%  
 Mean Neutralizer: 665.7 1466 856.5 871.1 111.0 163.6

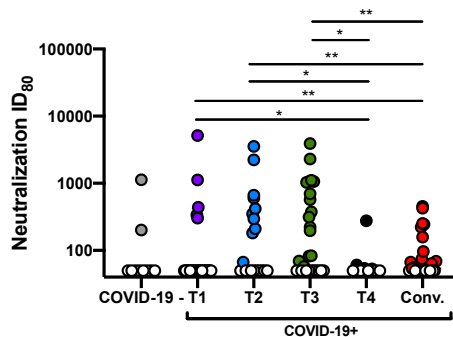

**I**

**SARS-CoV S**

Neutralizer (%): 10% 45.8% 50% 42.3% 11.1% 18.5%  
 Mean Neutralizer: 140.7 730.1 554.3 906.9 1038 181.3

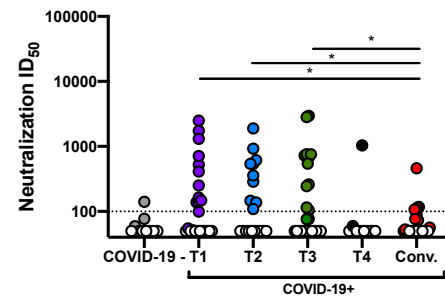

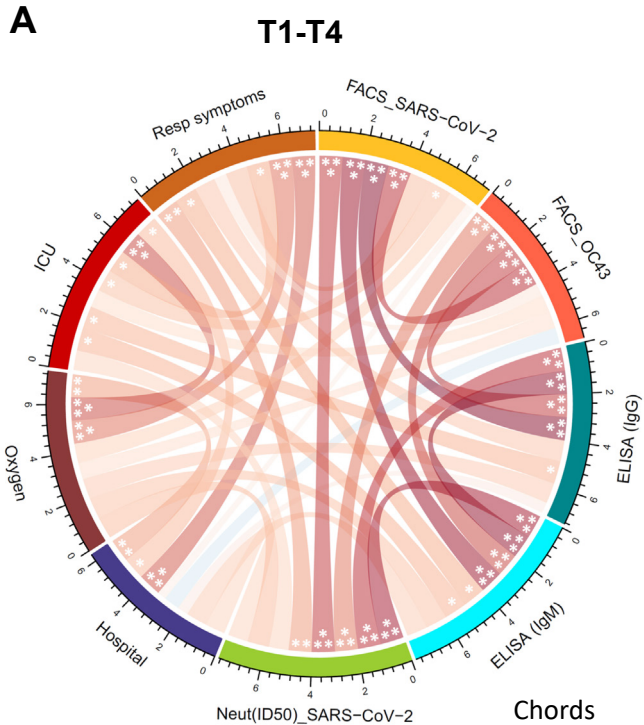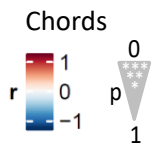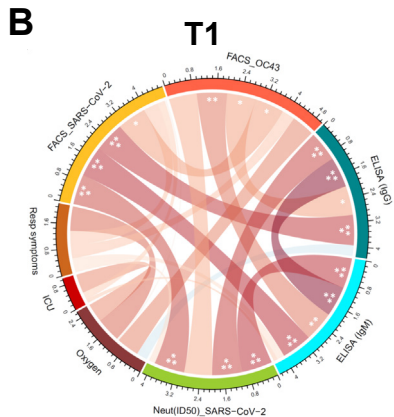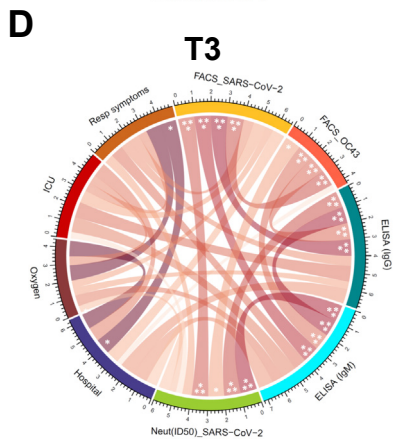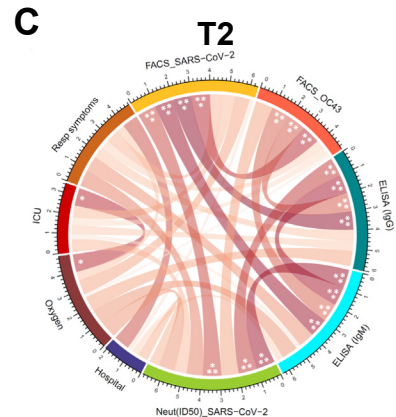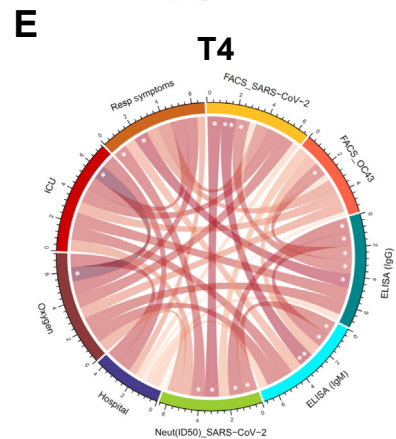

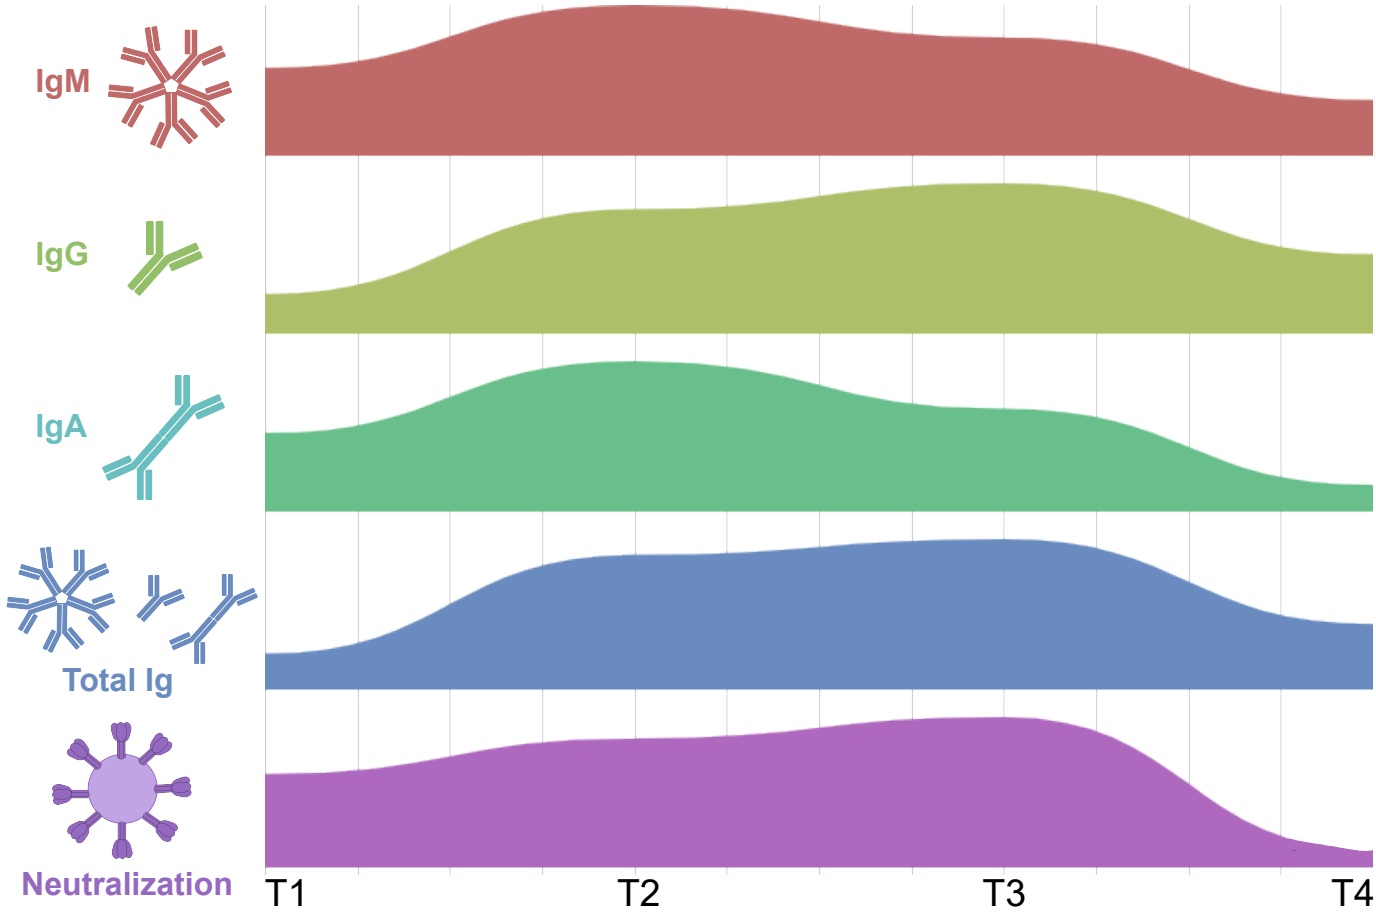

1 **Supplemental Information**

2 Supplemental information includes 1 table and 6 figures, and can be found online.

3

4 **Supplemental Table 1. Serological analysis of samples from SARS-CoV-2 infected**  
5 **individuals**

6

7 **Supplemental Figure 1. Detection of antibodies against cell-surface expressed SARS-CoV-2**  
8 **full Spike correlates with RBD-specific IgG and IgM.**

9 (A,C,E,G,I) Levels of recognition of the different human coronavirus Spikes (SARS-CoV-2 S,  
10 SARS-CoV, OC43 S, NL63 S, 229E S) evaluated by flow cytometry (Figure 2) were plotted  
11 against the levels of anti-RBD IgG and IgM evaluated by indirect ELISA (Figure 1). (B,D,F,H)  
12 Levels of recognition of different HCoV Spikes (SARS-CoV, OC43 S, NL63 S, 229E S) evaluated  
13 by flow cytometry were plotted against the levels of recognition of SARS-CoV-2 S (also evaluated  
14 by flow cytometry). Statistical analysis was performed using Spearman rank correlation tests.

15

16 **Supplemental Figure 2. Time course of antibodies against OC43 Spike upon SARS-CoV-2**  
17 **infection.**

18 (A) Cell-surface staining of 293T cells expressing full-length OC43 Spike (S) and (B) indirect  
19 ELISA using recombinant OC43 RBD. S-expressing cells or RBD-coated wells were incubated  
20 with samples from COVID-19 negative infants and adults or COVID-19 positive patients at  
21 different times after symptoms onset (T1, T2, T3, T4, Convalescent). (A) The graphs shown  
22 represent the median fluorescence intensities (MFI). Undetectable measures are represented as  
23 white symbols and limits of detection are plotted. (B) Anti-RBD binding was detected using anti-  
24 IgG-HRP. Relative light units (RLU) obtained with BSA (negative control) were subtracted and

25 further normalized to the signal obtained with the anti-OC43 RBD 4.3E4 mAb present in each  
26 plate. Data in graphs represent RLU done in quadruplicate, with error bars indicating means  $\pm$   
27 SEM. Undetectable measures are represented as white symbols and limits of detection are plotted.  
28 Statistical significance was tested using Kruskal-Wallis tests with a Dunn's post-test (\*\* P < 0.01;  
29 \*\*\* P < 0.001; \*\*\*\* P < 0.0001).

30

### 31 **Supplemental Figure 3. Characterization of 293T-ACE2 cell line**

32 Cell-surface staining of 293T cells and 293T stably expressing human ACE2 (293T-ACE2) with  
33 (A) polyclonal goat anti-ACE2 or (B) RBD conjugated with Alexa Fluor 594 (RBD-AF594).  
34 Shown in (A,B) are histograms depicting representative anti-ACE2 and RBD-AF594 staining. (C)  
35 Recombinant pseudovirus expressing luciferase and bearing SARS-CoV-2 or VSV-G  
36 glycoproteins were used to infect 293T or 293T-ACE2 and infectivity was quantified by luciferase  
37 activity in cell lysate by relative light units (RLU).

38

### 39 **Supplemental Figure 4. Anti-RBD antibodies positively correlate with neutralization.**

40 (A) The neutralization ID50 with SARS-CoV-2 S was correlated with the levels of anti-RBD IgG  
41 and IgM quantified by ELISA or (B) with the level of anti-SARS-CoV-2 S antibodies quantified  
42 by flow cytometry. Statistical significance was tested using Spearman rank correlation tests. (B)  
43 Indirect ELISA was performed using recombinant SARS-CoV-2 RBD and incubated with samples  
44 from COVID-19 negative or COVID-19 positive patients at different times after symptoms onset  
45 (T1, T2, T3, T4, Convalescent). Anti-RBD binding was detected using (B) anti-IgA-HRP. Relative  
46 light units (RLU) obtained with BSA (negative control) were subtracted and further normalized to  
47 the signal obtained with the anti-RBD CR3022 mAb present in each plate. Undetectable measures



48 are represented as white symbols and limits of detection are plotted. Statistical significance was  
49 tested using Kruskal-Wallis tests with a Dunn's post-test (\*  $P < 0.05$ ; \*\*  $P < 0.01$ ; \*\*\*\*  $P <$   
50  $0.0001$ ). (C) The levels of anti-RBD IgA were correlated with the neutralization  $ID_{50}$  with SARS-  
51 CoV-2 S, the level of anti-SARS-CoV-2 S antibodies quantified by flow cytometry and the levels  
52 of anti-RBD IgG and IgM quantified by ELISA. Statistical significance was tested using Spearman  
53 rank correlation tests.

54

55 **Supplemental Figure 5. Correlations between serological measurements and clinical**  
56 **outcome.**

57 Correlograms were generated by plotting together all serological and clinical data obtained from  
58 acutely infected COVID-19+ patients (T1, T2 and T3), separated by time points (a-c) or all  
59 together (d) or using data obtained from convalescent patients (e). Squares are color-coded  
60 according to the magnitude of the correlation coefficient ( $r$ ) and the square dimensions are  
61 inversely proportional with the P-values. Red squares represent a positive correlation between two  
62 variables and blue squares present negative correlations. Asterisks indicate all statistically  
63 significant correlations (\* $P < 0.05$ , \*\* $P < 0.01$ , \*\*\* $P < 0.005$ ). (a-e) Correlation analysis was done  
64 using nonparametric Spearman rank tests.

65

66 **Supplemental Figure 6. Clinical, demographic, and humoral factors associated with**  
67 **increased SARS-CoV-2 neutralization.** Forrest plot of the association of SARS-CoV-2  
68 neutralization with selected clinical, demographic, and humoral parameters. The fold change  
69 (mean and 95% confidence interval) of the parameters, listed on the y-axis, between neutralizers  
70 ( $ID_{50} > 100$ ) and non-neutralizers ( $ID_{50} < 100$ ) is displayed on the x-axis. Significance P and

- 71 adjusted P values (Holm-Sidak method) are shown in columns to the right. Results with  $P < 0.05$
- 72 are highlighted in green.

**A**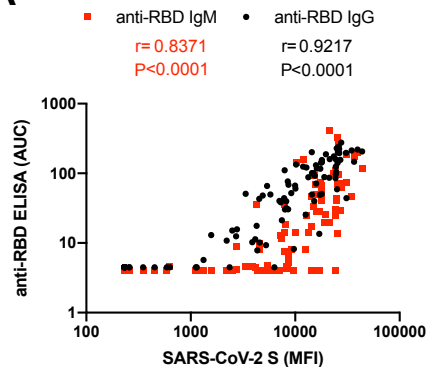**B**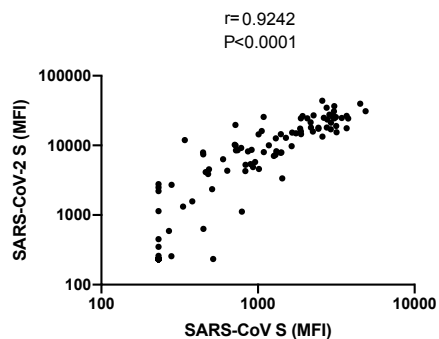**C**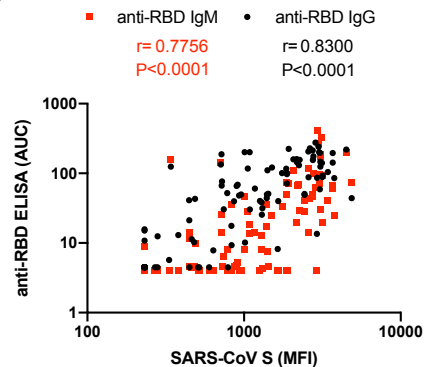**D**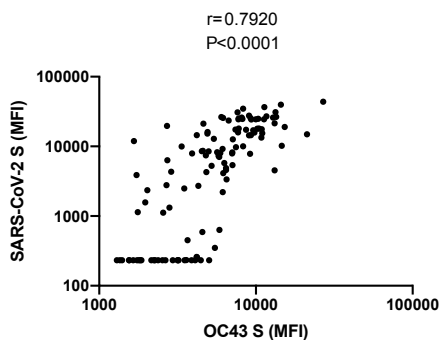**E**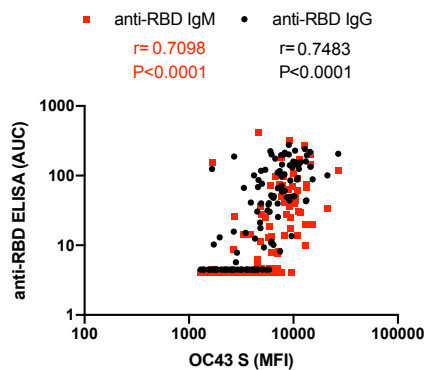**F**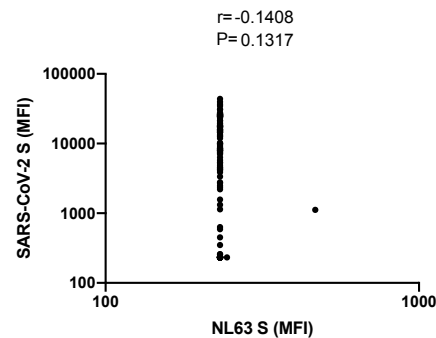**G**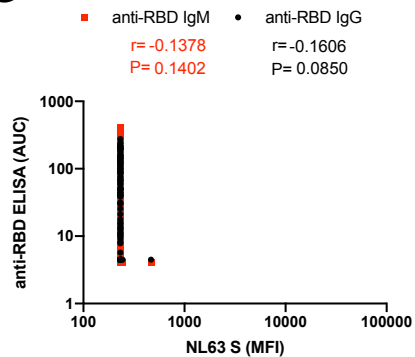**H**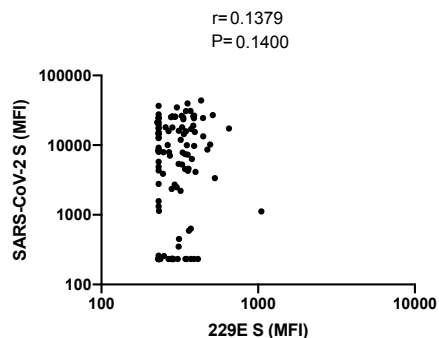**I**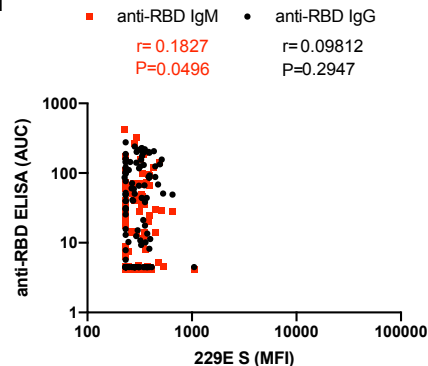

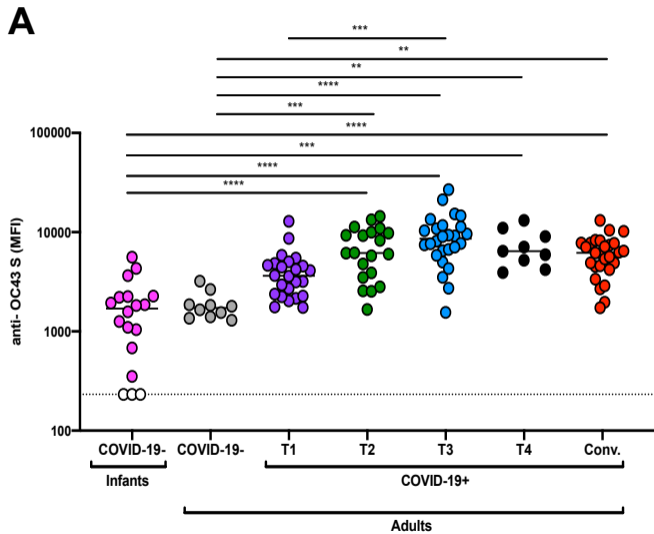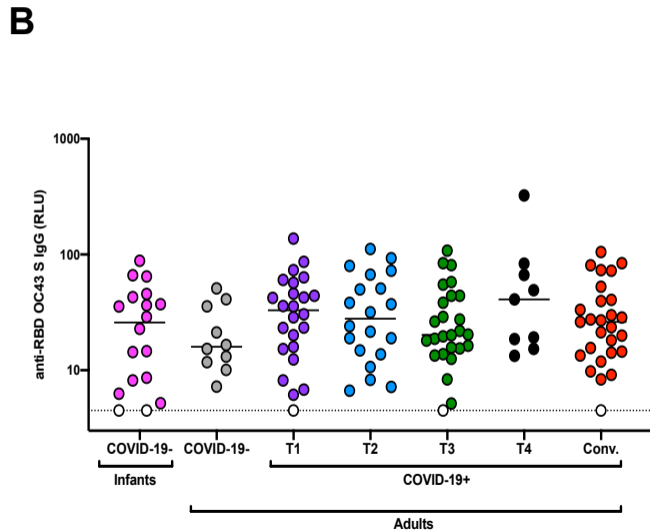

293T  
293T-ACE2

**A**

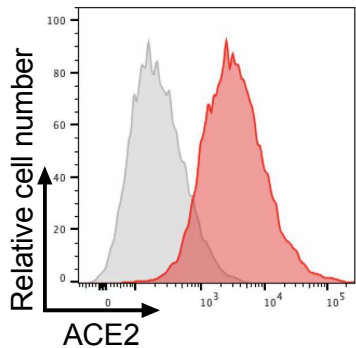

**B**

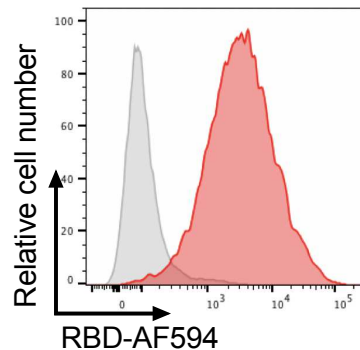

**C**

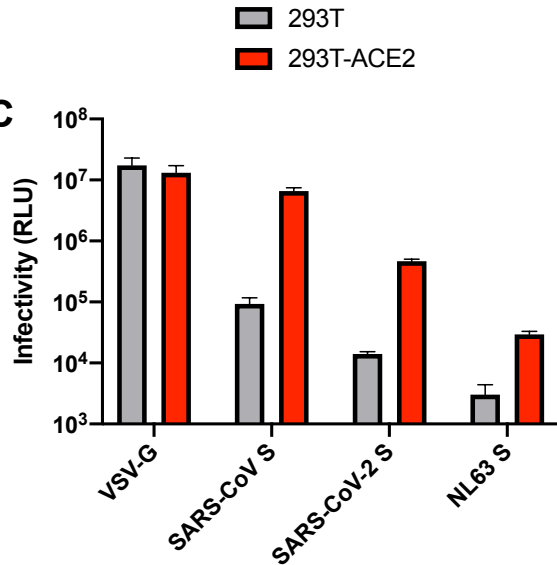

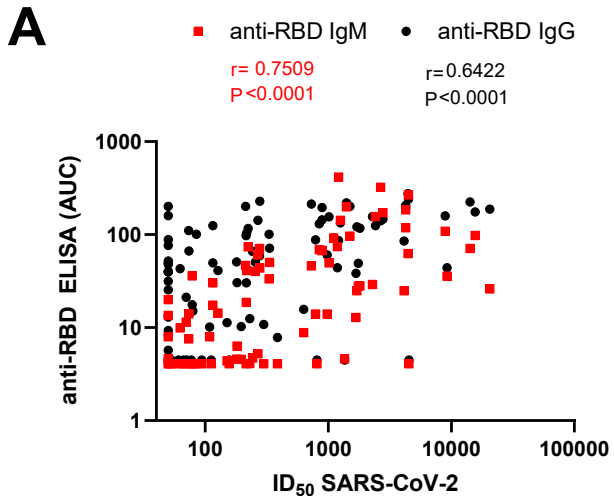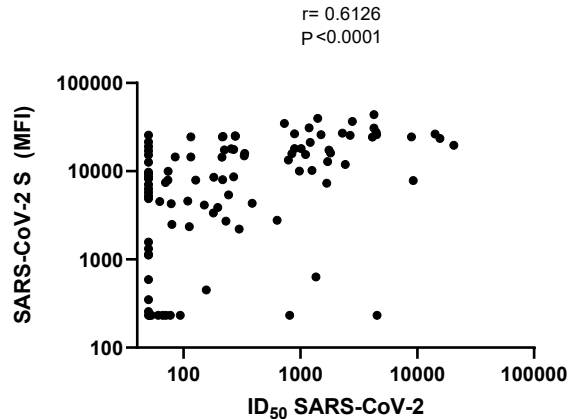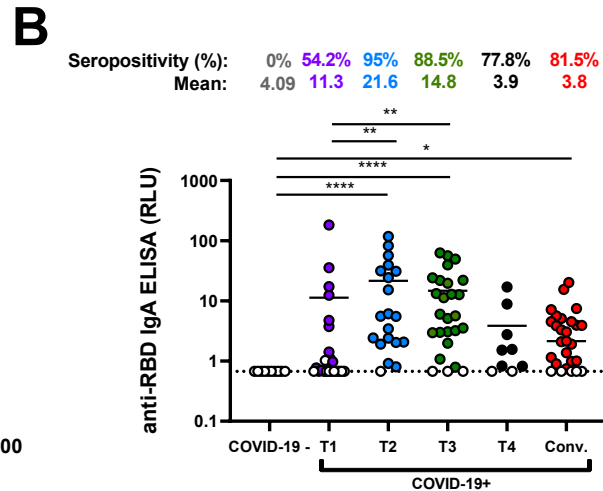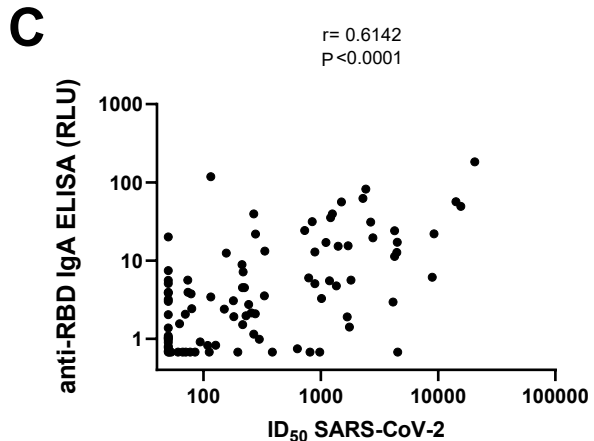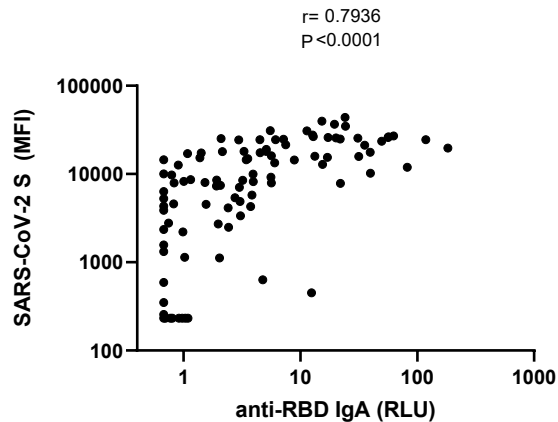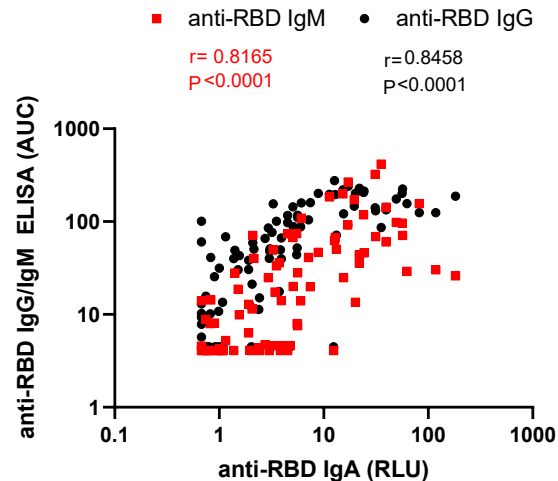

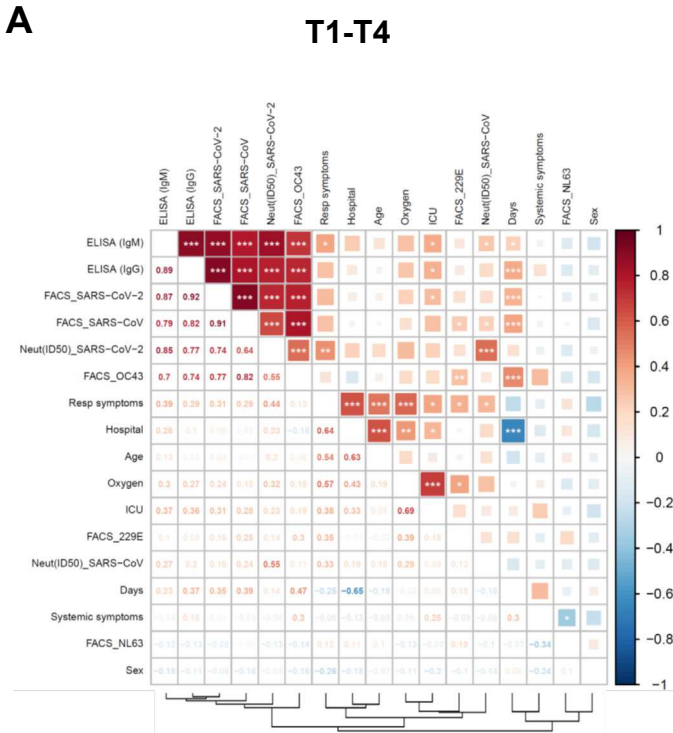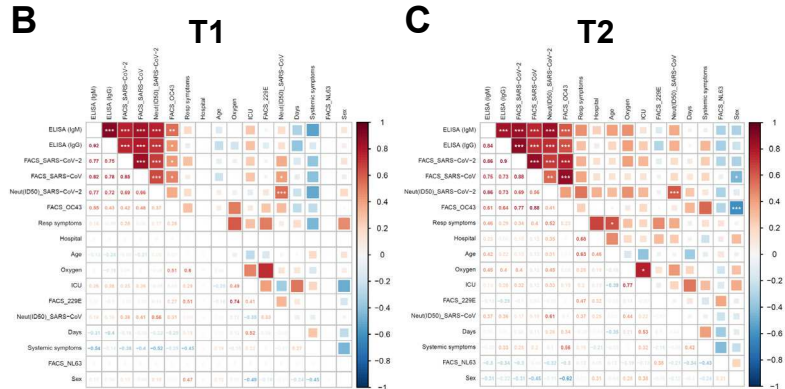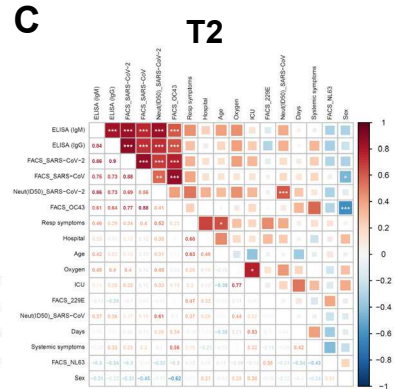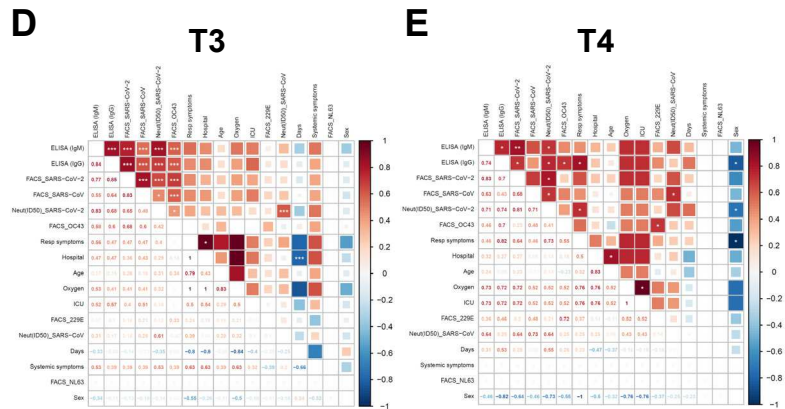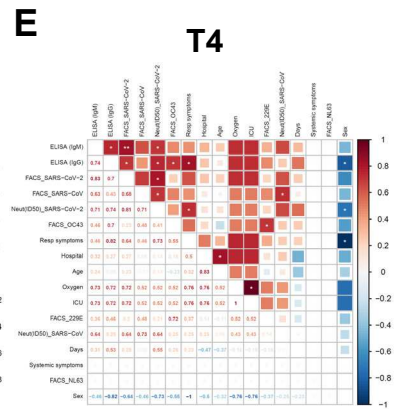

### Neut/Non-neut cases

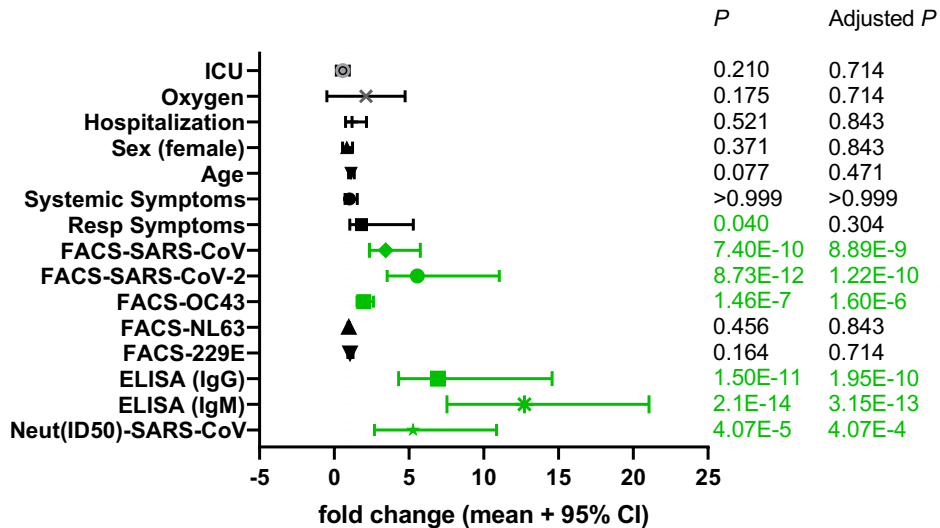



**Table S1.** Serological analysis of samples from COVID-19+ patients

| Patient ID | Group (T)    | Gender | FACS (MF)  |              |        |        |        | ELISA (AUC)  |              | Neutralization (ID50) |              |
|------------|--------------|--------|------------|--------------|--------|--------|--------|--------------|--------------|-----------------------|--------------|
|            |              |        | SARS-CoV S | SARS-CoV-2 S | OC43 S | NL63 S | 229E S | anti-RBD IgG | anti-RBD IgM | SARS-CoV S            | SARS-CoV-2 S |
| 1          | T1           | F      | 232        | 451          | 3664   | 232    | 313    | 4,49         | 4,09         | 250,63                | 156,47       |
| 2          | T1           | F      | 232        | 232          | 1743   | 232    | 232    | 4,49         | 4,09         | 50,00                 | 50,00        |
| 3          | T1           | M      | 2990       | 25903        | 12877  | 232    | 284    | 239,90       | 266,10       | 1739,43               | 4476,28      |
| 4          | T1           | M      | 831        | 4270         | 4831   | 232    | 356    | 17,60        | 35,98        | 50,00                 | 78,31        |
| 5          | T1           | F      | 448        | 631          | 5852   | 232    | 372    | 4,49         | 4,61         | 524,38                | 1353,00      |
| 6          | T1           | F      | 2924       | 21146        | 4629   | 232    | 227    | 86,39        | 415,00       | 50,00                 | 1211,53      |
| 7          | T1           | F      | 232        | 350          | 5471   | 232    | 311    | 4,49         | 4,09         | 54,67                 | 50,00        |
| 8          | T1           | M      | 232        | 232          | 3190   | 232    | 232    | 4,49         | 4,09         | 50,00                 | 50,00        |
| 9          | T1           | F      | 232        | 232          | 2152   | 232    | 344    | 4,49         | 4,09         | 51,20                 | 60,53        |
| 10         | T1           | F      | 232        | 232          | 4100   | 232    | 285    | 4,49         | 4,09         | 50,00                 | 50,00        |
| 11         | T1           | F      | 2435       | 17303        | 8659   | 232    | 651    | 49,05        | 28,00        | 1304,97               | 1752,85      |
| 12         | T1           | M      | 232        | 232          | 3155   | 232    | 372    | 4,49         | 4,09         | 50,00                 | 50,00        |
| 13         | T1           | M      | 232        | 232          | 5030   | 232    | 285    | 4,49         | 4,09         | 709,22                | 76,80        |
| 14         | T1           | M      | 270        | 590          | 4557   | 232    | 362    | 4,49         | 4,09         | 99,60                 | 50,00        |
| 15         | T1           | F      | 718        | 19719        | 2707   | 232    | 232    | 187,80       | 26,14        | 137,97                | 20533,88     |
| 16         | T1           | M      | 232        | 232          | 2945   | 232    | 287    | 4,49         | 4,09         | 50,00                 | 50,00        |
| 17         | T1           | F      | 232        | 1140         | 1762   | 232    | 233    | 4,49         | 4,09         | 50,00                 | 50,00        |
| 18         | T1           | F      | 232        | 232          | 4452   | 232    | 232    | 4,49         | 4,09         | 50,00                 | 50,00        |
| 19         | T1           | M      | 517        | 234          | 3598   | 232    | 283    | 4,49         | 4,09         | 145,33                | 50,00        |
| 20         | T1           | F      | 232        | 232          | 2270   | 232    | 287    | 4,49         | 4,09         | 162,42                | 52,85        |
| 21         | T1           | M      | 510        | 2356         | 2031   | 232    | 281    | 4,49         | 4,09         | 2497,50               | 111,87       |
| 22         | T1           | M      | 232        | 232          | 2237   | 232    | 413    | 4,49         | 4,09         | 147,54                | 50,00        |
| 23         | T1           | F      | 280        | 257          | 4206   | 232    | 251    | 4,49         | 4,09         | 411,52                | 50,00        |
| 24         | T1           | M      | 232        | 232          | 2380   | 232    | 238    | 4,49         | 4,09         | 50,00                 | 50,00        |
| 25         | T2           | F      | 1399       | 14478        | 9308   | 232    | 232    | 49,65        | 17,40        | 50,00                 | 115,05       |
| 26         | T2           | M      | 4493       | 39640        | 14425  | 232    | 354    | 219,10       | 199,40       | 540,54                | 1402,52      |
| 27         | T2           | F      | 332        | 1325         | 2810   | 232    | 232    | 5,70         | 4,09         | 50,00                 | 50,00        |
| 28         | T2           | F      | 341        | 11926        | 1664   | 232    | 321    | 124,80       | 155,90       | 145,48                | 2412,55      |
| 29         | T2           | M      | 782        | 9188         | 6132   | 232    | 232    | 51,97        | 7,96         | 50,00                 | 50,00        |
| 30         | T2           | F      | 447        | 7454         | 4791   | 232    | 342    | 21,14        | 11,48        | 50,00                 | 69,88        |
| 31         | T2           | F      | 2743       | 34747        | 8276   | 232    | 303    | 213,50       | 46,18        | 50,00                 | 727,27       |
| 32         | T2           | M      | 3144       | 25468        | 9244   | 232    | 293    | 140,80       | 322,70       | 287,27                | 2662,41      |
| 33         | T2           | M      | 232        | 232          | 3888   | 232    | 391    | 4,49         | 4,09         | 50,00                 | 50,00        |
| 34         | T2           | M      | 2067       | 24488        | 9993   | 232    | 232    | 158,70       | 108,50       | 137,12                | 8904,72      |
| 35         | T2           | F      | 790        | 1122         | 2563   | 467    | 1048   | 4,49         | 4,09         | 50,00                 | 50,00        |
| 36         | T2           | M      | 3686       | 17679        | 10901  | 232    | 232    | 142,40       | 60,33        | 921,66                | 267,67       |
| 37         | T2           | F      | 1927       | 26403        | 6020   | 232    | 326    | 224,40       | 71,17        | 1890,72               | 14178,36     |
| 38         | T2           | F      | 232        | 2495         | 3489   | 232    | 302    | 15,06        | 4,09         | 50,00                 | 79,30        |
| 39         | T2           | M      | 464        | 4142         | 6185   | 232    | 399    | 11,33        | 4,36         | 614,63                | 149,99       |
| 40         | T2           | F      | 2243       | 15808        | 9790   | 232    | 346    | 130,50       | 68,94        | 108,89                | 843,17       |
| 41         | T2           | F      | 1293       | 7294         | 5772   | 232    | 355    | 38,45        | 12,87        | 356,13                | 1675,60      |
| 42         | T2           | M      | 4868       | 30938        | 13324  | 232    | 370    | 43,95        | 74,30        | 50,00                 | 1184,97      |
| 43         | T2           | F      | 232        | 232          | 2532   | 232    | 307    | 4,49         | 4,09         | 540,83                | 93,37        |
| 44         | T2           | M      | 3073       | 24535        | 11264  | 232    | 445    | 124,90       | 30,34        | 50,00                 | 115,31       |
| 45         | T3           | M      | 3016       | 25909        | 8125   | 232    | 386    | 201,50       | 96,50        | 260,42                | 1499,25      |
| 46         | T3           | F      | 2634       | 24951        | 10356  | 232    | 332    | 228,90       | 43,84        | 50,00                 | 276,85       |
| 47         | T3           | M      | 3686       | 26501        | 13482  | 232    | 391    | 195,10       | 67,27        | 104,66                | 887,31       |
| 48         | T3           | M      | 1428       | 3351         | 6496   | 232    | 529    | 50,75        | 4,58         | 2954,21               | 179,82       |
| 49         | T3           | M      | 723        | 8490         | 4998   | 232    | 232    | 76,63        | 4,62         | 50,00                 | 50,00        |
| 50         | T3           | F      | 1396       | 7833         | 9176   | 232    | 330    | 43,99        | 35,77        | 2834,47               | 9208,10      |
| 51         | T3           | F      | 1263       | 7064         | 5836   | 232    | 274    | 40,10        | 4,09         | 50,00                 | 50,00        |
| 52         | T3           | F      | 2583       | 13350        | 10850  | 232    | 446    | 87,89        | 14,00        | 244,68                | 788,02       |
| 53         | T3           | F      | 3161       | 19011        | 15261  | 232    | 386    | 88,59        | 20,06        | 50,00                 | 50,00        |
| 54         | T3           | F      | 2264       | 27040        | 11678  | 232    | 514    | 156,50       | 29,01        | 76,51                 | 2288,33      |
| 55         | T3           | M      | 232        | 232          | 3511   | 232    | 280    | 4,49         | 4,09         | 50,00                 | 50,00        |
| 56         | T3           | F      | 1747       | 14934        | 21177  | 232    | 232    | 100,70       | 33,47        | 50,00                 | 329,92       |
| 57         | T3           | F      | 1641       | 9732         | 7461   | 232    | 391    | 8,22         | 4,09         | 50,00                 | 50,00        |
| 58         | T3           | F      | 2575       | 43788        | 26862  | 232    | 433    | 205,40       | 118,80       | 50,00                 | 4255,32      |
| 59         | T3           | F      | 281        | 2714         | 4297   | 232    | 293    | 12,51        | 4,12         | 722,02                | 229,94       |
| 60         | T3           | F      | 232        | 232          | 1553   | 232    | 236    | 4,49         | 4,09         | 75,99                 | 50,00        |
| 61         | T3           | F      | 2919       | 17013        | 9604   | 232    | 374    | 13,49        | 4,09         | 50,00                 | 50,00        |
| 62         | T3           | M      | 1878       | 15855        | 7696   | 232    | 268    | 71,25        | 50,23        | 50,00                 | 332,23       |
| 63         | T3           | M      | 711        | 10219        | 14607  | 232    | 494    | 133,50       | 142,70       | 50,00                 | 1252,98      |
| 64         | T3           | M      | 3053       | 30735        | 7638   | 232    | 346    | 196,80       | 184,50       | 114,73                | 4258,94      |
| 65         | T3           | M      | 3770       | 24356        | 9342   | 232    | 390    | 85,23        | 24,97        | 681,20                | 4123,71      |
| 66         | T3           | M      | 3067       | 36647        | 11330  | 232    | 232    | 147,00       | 172,40       | 759,88                | 2782,42      |
| 67         | T3           | F      | 2774       | 23502        | 6892   | 232    | 333    | 175,20       | 97,95        | 755,29                | 15586,03     |
| 68         | T3           | F      | 2861       | 27590        | 9046   | 232    | 232    | 275,80       | 62,70        | 544,37                | 4444,44      |
| 69         | T3           | F      | 599        | 6316         | 2720   | 232    | 378    | 4,49         | 4,09         | 50,00                 | 50,00        |
| 70         | T3           | F      | 1412       | 7916         | 7058   | 232    | 249    | 110,50       | 7,55         | 50,00                 | 73,21        |
| 71         | T4           | M      | 3175       | 15418        | 10990  | 232    | 395    | 92,55        | 92,04        | 1037,56               | 1105,22      |
| 72         | T4           | M      | 1009       | 14429        | 9029   | 232    | 336    | 200,70       | 46,64        | 50,00                 | 212,59       |
| 73         | T4           | F      | 487        | 4529         | 13163  | 232    | 342    | 42,91        | 9,91         | 50,00                 | 62,46        |
| 74         | T4           | F      | 1089       | 8002         | 5933   | 232    | 232    | 30,25        | 18,67        | 59,59                 | 215,84       |
| 75         | T4           | M      | 897        | 5377         | 7080   | 232    | 311    | 65,94        | 4,71         | 50,00                 | 242,54       |
| 76         | T4           | F      | 1013       | 4574         | 6444   | 232    | 360    | 10,16        | 7,98         | 50,00                 | 108,25       |
| 77         | T4           | F      | 232        | 260          | 4186   | 232    | 232    | 4,49         | 4,09         | 50,00                 | 50,00        |
| 78         | T4           | F      | 832        | 5260         | 5220   | 232    | 327    | 9,32         | 4,09         | 50,00                 | 50,00        |
| 79         | T4           | F      | 446        | 7935         | 3912   | 232    | 270    | 41,04        | 14,35        | 50,00                 | 126,79       |
| 80         | Convalescent | M      | 2179       | 18055        | 7778   | 232    | 257    | 143,90       | 67,60        | 50,00                 | 887,31       |
| 81         | Convalescent | M      | 232        | 2775         | 2685   | 232    | 232    | 15,69        | 8,86         | 73,10                 | 631,31       |
| 82         | Convalescent | M      | 742        | 8550         | 4515   | 232    | 232    | 30,54        | 6,33         | 50,00                 | 181,00       |
| 83         | Convalescent | M      | 1172       | 10054        | 8280   | 232    | 265    | 60,59        | 13,99        | 462,11                | 979,43       |
| 84         | Convalescent | M      | 232        | 2205         | 6135   | 232    | 320    | 10,82        | 4,09         | 76,57                 | 298,42       |
| 85         | Convalescent | F      | 3044       | 25170        | 7781   | 232    | 278    | 59,04        | 71,09        | 50,00                 | 276,40       |
| 86         | Convalescent | M      | 1655       | 15237        | 4901   | 232    | 232    | 39,86        | 4,09         | 50,00                 | 50,00        |
| 87         | Convalescent | M      | 911        | 8625         | 4588   | 232    | 474    | 68,48        | 5,22         | 50,00                 | 267,95       |
| 88         | Convalescent | M      | 1056       | 16116        | 4911   | 232    | 312    | 117,20       | 28,04        | 106,91                | 1806,68      |
| 89         | Convalescent | F      | 864        | 8202         | 7062   | 232    | 232    | 39,63        | 4,60         | 50,00                 | 50,00        |
| 90         | Convalescent | M      | 381        | 1569         | 1968   | 232    | 232    | 13,02        | 4,09         | 50,00                 | 50,00        |
| 91         | Convalescent | M      | 3431       | 24732        | 8195   | 232    | 232    | 104,30       | 41,20        | 117,27                | 217,72       |
| 92         | Convalescent | M      | 1862       | 17395        | 7403   | 232    | 232    | 116,70       | 73,81        | 50,00                 | 223,36       |
| 93         | Convalescent | M      | 1509       | 12831        | 5386   | 232    | 232    | 121,60       | 24,84        | 88,57                 | 1706,19      |
| 94         | Convalescent | M      | 958        | 5784         | 6278   | 232    | 232    | 49,68        | 4,09         | 50,00                 | 50,00        |
| 95         | Convalescent | M      | 2434       | 17985        | 10192  | 232    | 284    | 50,63        | 40,18        | 50,00                 | 254,91       |
| 96         | Convalescent | M      | 2171       | 21444        | 13151  | 232    | 232    | 159,80       | 19,93        | 50,00                 | 50,00        |
| 97         | Convalescent | M      | 1086       | 25681        | 6177   | 232    | 296    | 201,80       | 13,49        | 50,00                 | 50,00        |
| 98         | Convalescent | M      | 2751       | 18042        | 10467  | 232    | 327    | 155,70       | 49,73        | 50,00                 | 1011,94      |
| 99         | Convalescent | F      | 1877       | 24491        | 7723   | 232    | 232    | 97,20        | 4,09         | 50,00                 | 214,50       |
| 100        | Convalescent | F      | 720        | 9995         | 3355   | 232    | 351    | 66,59        | 14,12        | 114,35                | 73,75        |
| 101        | Convalescent | M      | 1299       | 12623        | 7128   | 232    | 232    | 25,44        | 8,07         | 50,00                 | 50,00        |
| 102        | Convalescent | F      | 1309       | 8246         | 5663   | 232    | 232    | 31,52        | 4,25         | 50,00                 | 50,00        |
| 103        | Convalescent | F      | 637        | 4335         | 2877   | 232    | 232    | 7,81         | 4,09         | 106,09                | 385,36       |
| 104        | Convalescent | M      | 930        | 4893         | 6456   | 232    | 232    | 47,88        | 4,09         | 50,00                 | 50,00        |
| 105        | Convalescent | M      | 481        | 3878         | 1729   | 232    | 247    | 10,29        | 4,57         | 52,77                 | 196,23       |
| 106        | Convalescent | F      | 1883       | 14455        | 4195   | 232    | 232    | 100,70       | 4,09         | 56,40                 | 84,53        |
